# Supplementary material for: The Isolated Choice Effect and Its Implications for Gender Diversity in Organizations
Source: Atypon-hosted journal article supplement (doi:10.1287/mnsc.2019.3533), 2020-03-04

**Online Supplement for “The Isolated Choice Effect and Its Implications for Gender  
Diversity in Organizations”**

**Table of Contents**

|                                                 |          |
|-------------------------------------------------|----------|
| Preregistered Exploratory Analyses for Study 1  | Page 2   |
| Robustness Checks: Logistic Regression Analyses | Page 4   |
| Supplementary Studies                           |          |
| Study S1: Conceptual Replication of Study 1     | Page 6   |
| Study S2: Unrelated Decisions Paradigm          | Page 9   |
| Study S3: Diversity Levels Moderation           | Page 12  |
| Study S4: Majority Female Paradigm              | Page 15  |
| Tables                                          |          |
| Table S1: Study 1 Regression Results            | Page 17  |
| Table S2: Study 2 Regression Results            | Page 18  |
| Table S3: Study 3A Regression Results           | Page 19  |
| Table S4: Study 3B Regression Results           | Page 20  |
| Table S5: Study 4B Regression Results           | Page 21  |
| Study Stimuli                                   |          |
| Screenshots of Study 1 Stimuli                  | Page 22  |
| Screenshots of Study 2 Stimuli                  | Page 32  |
| Screenshots of Study 3A Stimuli                 | Page 39  |
| Screenshots of Study 3B Stimuli                 | Page 50  |
| Screenshots of Study 4A Stimuli                 | Page 64  |
| Screenshots of Study 4B Stimuli                 | Page 72  |
| Screenshots of Study S1 Stimuli                 | Page 80  |
| Screenshots of Study S2 Stimuli                 | Page 90  |
| Screenshots of Study S3 Stimuli                 | Page 95  |
| Screenshots of Study S4 Stimuli                 | Page 108 |

## Preregistered Exploratory Analyses for Study 1

In Study 1, we preregistered that we would collect data on whether participants were thinking about diversity when making their hiring decisions in an exploratory fashion (<http://aspredicted.org/blind.php?x=4kg79v>). Participants indicated their agreement with the statement “To what extent were you thinking about the diversity of the overall group of new hires when making your hiring decisions?” on a 1 (Not at all) to 7 (Extremely) scale. As an exploratory analysis, we tested whether participants’ responses to this question mediated the relationship between choice condition (isolated choice vs. collective choice) and gender diversity of the group of hires.

We ran a bootstrap analysis with 5,000 iterations to test whether the extent to which people considered group diversity when making hiring decisions mediated the relationship between choice condition and the gender diversity of hires. Following our preregistration plan, in this mediation analysis, we operationalized gender diversity as the average number of women hired by the participant; thus, in the *isolated choice* condition, the possible outcome values were 0 or 1, while in the *collective choice* condition, the possible outcome values were 0, 0.2, 0.4, 0.6, 0.8, or 1. We found that people’s considerations of group diversity when making hiring decisions partially mediated the effect of choice condition on the gender diversity of hires. Specifically, the effect of being assigned to the *isolated choice* condition on how much people considered group diversity was significant ( $b_{isolated\_choice} = -1.05, SE = 0.25, p < 0.001$ ), and we also found a significant positive relationship between considering group diversity and the gender diversity of hires ( $b_{diversity\_considered} = 0.045, SE = 0.0054, p < 0.001$ ). The effect of being assigned to the *isolated choice* condition on the gender diversity of hires ( $b_{isolated\_choice} = -0.105, SE = 0.033, p = 0.001$ ) was weakened to marginal significance when we included group diversity

considerations in the regression ( $b_{isolated\_choice} = -0.060, SE = 0.032, p = 0.057$ ). The indirect effect of group diversity considerations was significant, as the 95% bias-corrected confidence interval with 5,000 bootstrap samples reveals that the size of the indirect effect excluded zero (95% CI: -0.077, -0.020).

In an additional exploratory analysis that was not preregistered, we examined whether the rates of choosing the black male candidate were different across experimental conditions. Only one of the five choices included a black male candidate, so we restricted our attention to that choice. There were 85 participants in the *isolated choice* condition who were faced with the decision including the black male candidate, and all 69 participants in the *collective choice* condition made the same choice. We found that the black male was chosen marginally more in the *collective choice* condition (39.1%) than in the *isolated choice* condition (24.7%),  $\chi^2(1, N = 154) = 3.05, p = 0.08$ .

## Robustness Checks: Logistic Regression Analyses

As a robustness check, we re-ran all of our primary study analyses using logistic regressions rather than OLS regressions with standard errors clustered at the participant level to account for the fact that participants in the *collective choice* conditions made multiple decisions. None of our results change in direction or significance as a result of using logistic regressions instead of OLS regressions, and below we detail our findings.

**Study 1 Results:** Consistent with our OLS results, assignment to the *isolated choice* condition was associated with a significantly lower likelihood of choosing a woman ( $b_{isolated\_choice} = -1.00$ ,  $SE = 0.241$ ,  $p < 0.001$ ; 95% CI: [-1.48, -0.533]).

**Study 2 Results:** Consistent with our OLS results, assignment to the *isolated choice* condition was associated with a significantly lower likelihood of choosing a female author ( $b_{isolated\_choice} = -0.279$ ,  $SE = 0.141$ ,  $p = 0.047$ ; 95% CI: [-0.554, -0.003]).

**Study 3A Results:** Consistent with our OLS results, assignment to the *isolated choice* condition was associated with a lower likelihood of choosing a woman ( $b_{isolated\_choice} = -0.394$ ,  $SE = 0.201$ ,  $p = 0.050$ ; 95% CI: [-0.788, -0.001]).

**Study 3B Results:** Consistent with our OLS results, there was a significant positive interaction between the *diversity valued* and *isolated choice* conditions, indicating a higher likelihood of choosing women in the *isolated choice* condition when we drew attention to diversity ( $b_{isolated\_choice*diversity\_valued} = 0.630$ ,  $SE = .238$ ,  $p = 0.008$ ; 95% CI: [0.163, 1.097]). Furthermore, the effect of the *isolated choice* condition on the likelihood of choosing a woman was significant and negative when we restrict our attention to the *control* condition in which diversity was not made salient ( $b_{isolated\_choice} = -0.654$ ,  $SE = .190$ ,  $p = 0.001$ ; 95% CI: [-1.026, -0.283]), while the

effect of assignment to the *isolated choice* condition was not significant when diversity was salient ( $b_{isolated\_choice} = -0.024$ ,  $SE = .145$ ,  $p = 0.867$ ; 95% CI: [-0.308, 0.259]).

**Study 4B Results:** Consistent with our OLS results, assignment to the *isolated choice* condition was associated with a significantly lower likelihood of choosing a woman ( $b_{isolated\_choice} = -0.692$ ,  $SE = 0.146$ ,  $p < 0.001$ ; 95% CI: [-0.977, -0.406]).

## SUPPLEMENTARY STUDIES

### S1. Conceptual Replication of Study 1.

In Study S1, we replicated our results from Study 1 in a different hypothetical organizational context: selecting professors to serve on a prestigious university task force.

#### Methods

**Participants.** We decided in advance to recruit 525 participants through Amazon's Mechanical Turk. After excluding participants who did not follow directions (following our preregistration plan), we were left with 510 participants (48.8% of whom identified as men). Participants were paid \$0.70 to take a survey that took about five minutes to complete. This study was preregistered on AsPredicted.org (<http://aspredicted.org/blind.php?x=84zt5f>).

**Procedure.** Participants were asked to imagine they had to select professors to serve on a prestigious university task force. They were told that the university had five different academic divisions and the task force would include one professor from each division.

Participants were randomly assigned to either an *isolated choice* condition or a *collective choice* condition. In the *isolated choice* condition, participants were told they would have to select one professor from one of the academic divisions to join the task force. In the *collective choice* condition, participants were told they would have to select all five members of the task force, one from each academic division. Since participants in the *isolated choice* condition made one selection and those in the *collective choice* condition made five selections, we assigned five times as many participants to the *isolated choice* condition.

After reading instructions about their selection task, participants read a description of the task force's mission and were shown a list of the university's academic divisions. In the *isolated choice* condition, participants then were instructed to select a professor from just one of these

five academic divisions (selected at random), while in the *collective choice* condition, participants selected a candidate from each of the five academic divisions. After reading these descriptions, participants saw the faculty candidates and were asked to make their selections. For each academic division, we presented participants with three professors who were candidates for the task force. The candidates from each division were held constant across conditions, so the decisions participants made were completely equivalent across conditions; the only thing that differed across conditions was the number of decisions participants made. All decisions were made under joint evaluation since participants in both conditions were choosing among three candidates from each division. At least two of the candidates were always men, and for two of the five divisions, we included only male candidates to obscure our focus on gender diversity. Participants were provided with each candidate's picture (taken from the Chicago Face Database; Ma, Correll, & Wittenbrink, 2015), academic division, professorial title, department, and number of years at the university. Screenshots of the study are available on page 80 of this Online Supplement.

## Results

Our dependent variable of interest was whether a woman was selected in each task force decision.<sup>1</sup> In the *isolated choice* condition, 12.9% of the professors selected were women; in the *collective choice* condition, 19.5% of the professors selected were women (if participants had chosen at random, 20% of the professors selected would have been women). Following our preregistered analysis plan, we ran an ordinary least squares regression with robust standard errors clustered by participant to predict the selection of a female professor in each task force decision. The unit of analysis was a single selection decision, so participants in the *collective*

---

<sup>1</sup> As in Study 1, for decisions where all three candidates were men, the dependent variable was coded as zero in both conditions. Our results are identical regardless of whether we include these decisions in our analyses.

*choice* condition contributed five times as many data points to the regression as participants in the *isolated choice* condition. Our only predictor variable was an indicator for random assignment to the *isolated choice* condition. Replicating our results from Study 1, we found that participants in the *isolated choice* condition were significantly less likely to select female professors for the university task force ( $b_{isolated\_choice} = -0.066$ ,  $SE = 0.028$ ,  $p = 0.0205$ , 95% CI: [-0.121, -0.010]) than were participants in the *collective choice* condition. This study provides further evidence that making isolated choices produces less gender-diverse groups than making sets of selection decisions.

### **Preregistered Exploratory Analyses for Study S1**

In Study S1, we preregistered that we would run a secondary analysis to explore whether choice condition (isolated choice vs. collective choice) affected the racial and gender diversity of the group of hires, as opposed to only studying the gender diversity of the group of hires (<http://aspredicted.org/blind.php?x=84zt5f>). In the *isolated choice* condition, 37.1% of the professors selected were not white men (they were instead white women or black men); in the *collective choice* condition, 41.8% of the professors selected were white women or black men. As preregistered, we ran an ordinary least squares regression with robust standard errors and errors clustered by participant to predict whether a white female or black male professor was chosen. Our independent variable was an indicator variable for being in the *isolated choice* condition. We found that the effect of being in the *isolated choice* condition on the likelihood of selecting a white female or black male professor was not significant ( $b_{isolated\_choice} = -0.047$ ,  $p = 0.173$ ).

## **S2. Unrelated Decisions Paradigm.**

Since participants in the *collective choice* condition had to make five times as many decisions as those in the *isolated choice* condition for Studies 1, 3A, 3B, 4B, and S1, one potential concern is that fatigue or depletion could be driving our findings. To address this concern, we redesigned the decision task in the *isolated choice* condition so participants would make just as many decisions as participants in the *collective choice* condition. We again predicted that participants would select fewer female candidates in the *isolated choice* condition than in the *collective choice* condition. This study was preregistered on AsPredicted.org (<http://aspredicted.org/blind.php?x=kn8rb5>).

### **Methods**

**Participants.** Six hundred and fifty-four U.S. participants (39.5% identified as men) were recruited through Amazon's Mechanical Turk to participate in a short online research study. Participants were paid \$0.60 to complete a survey that would take about 5 minutes of their time.

**Procedures.** We used the same study paradigm as in Study 1: participants were told we were interested in understanding how people make hiring decisions and were asked to imagine they were hiring for a technology company that was looking to fill five different roles.

Participants were randomly assigned to either the *isolated choice* condition or the *collective choice* condition. In the *isolated choice* condition, participants were told they would have to hire one person to fill one of the five roles. In the *collective choice* condition, participants were told they would have to hire five people (i.e. one person to fill each of the five roles).

Participants were then shown descriptions for each of the five roles to be filled by the organization, and in the *isolated choice* condition, we asked participants to select the candidate who would fill one of these roles (the role they were asked to fill was selected at random). After

reading all five job descriptions, participants were asked to make hiring decisions for the role(s) they were responsible for filling. In order to equalize the number of decisions made across conditions (to control for fatigue or depletion), participants in the *isolated choice* condition were also asked to make four additional choices that were unrelated to the hiring decision but identical in structure. The additional choices involved selecting their preferred object out of a set of three (e.g., their preferred pen out of a set of three pens). In both conditions, all choices were shown on the same screen.

For each hiring decision, participants were asked to choose among three candidates who had prior work experience in a relevant job. The candidates were held constant across conditions. The three candidates always included at least two men. As in previous studies, we included three men as candidates for one job to obscure the fact that our study was focused on gender diversity. Participants were provided with each candidate's picture (taken from the Chicago Face Database; Ma, Correll, & Wittenbrink, 2015), most recent job, and years of experience. For the additional decisions made in the *isolated choice* condition (to equalize the number of decisions across conditions), participants were shown a picture of each object under consideration and other relevant information such as its price. The order of each hiring decision was held constant across conditions, such that participants in the *isolated choice* condition saw the focal decision in the same position on the page (relative to the other decisions) as participants in the *collective choice* condition. Screenshots of the study are available on page 90 of this Online Supplement.

## **Results**

Our dependent variable of interest was whether a woman was selected in each hiring decision. In the *isolated choice* condition, women were chosen in 11.7% of the hiring decisions; in the *collective choice* condition, women were chosen in 21.1% of the hiring decisions.

Following our preregistered analysis plan, we ran an ordinary least squares regression with robust standard errors clustered by participant to predict whether a female candidate was chosen in each selection decision. Our independent variable was an indicator variable for being in the *isolated choice* condition. Replicating Studies 1 and S1, we found that being in the *isolated choice* condition significantly decreased the likelihood of selecting a female candidate ( $b_{isolated\_choice} = -0.095, p < 0.001$ ). This study suggests that isolated hiring decisions lead to less gender-diverse groups than sets of hiring decisions, and it suggests that this phenomenon cannot be explained by increased choice requirements and resulting fatigue in the *collective choice* condition.

### **S3. Diversity Levels Moderation.**

In Study S3, we tested whether informing participants of the gender diversity of their organization as a whole would affect how they behaved in the *isolated choice* condition. Given that isolated choices lack group information, we expected that telling participants about their organization's overall diversity would help contextualize their choices. We hypothesized that when organizational diversity levels were high, they would not feel a strong need to consider diversity in their decision-making, whereas when diversity levels were low, they would be more likely to feel a salient need to consider how their decision would affect the overall gender diversity of the organization. Thus, we predicted that the isolated choice effect would be attenuated when participants were informed that their organization had low overall levels of diversity immediately before making their hiring decision. We set out to test this prediction in Study S3.

#### **Methods**

**Participants.** We decided in advance to recruit 950 participants through Amazon's Mechanical Turk. After excluding participants who did not follow directions (following our preregistration plan), we were left with 930 participants (56.5% of whom identified as men). Participants were paid \$0.40 to take a survey that could be completed in about four minutes. This study was preregistered on AsPredicted.org (<http://aspredicted.org/blind.php?x=m2m8yx>).

**Procedures.** Similar to Studies 1, S2, and 3A, participants in this study were asked to imagine they were hiring for a technology company that was looking to fill five different roles. Participants in this study were randomly assigned to one of four conditions in a 2x2 (*isolated choice* vs. *collective choice* x *low diversity* vs. *high diversity*) factorial design. Participants assigned to the *isolated choice* conditions were told they would be tasked with hiring one person

to fill one of these five roles. Those in the *collective choice* conditions were told they would be tasked with hiring five people, one for each role.

Across all conditions, participants were given some brief facts about their organization, including when it was founded, its locations, how many of its employees had college degrees, and how many of its employees were women. Participants assigned to the *low diversity* conditions were informed that 19% of the organization's employees were women, whereas participants assigned to the *high diversity* condition were told that 48% of the company's employees were women. Participants were reminded of all of this company information immediately before making their hiring decisions.

For each role they were asked to fill, participants chose between three candidates with prior work experience in a relevant job. These candidates were held constant across conditions, and always included at least two men (one of the four decisions included three men as candidates to conceal that our study focused on gender diversity). Participants were provided with each candidate's picture (taken from the Chicago Face Database; Ma, Correll, & Wittenbrink, 2015), most recent job, and number of years of experience.

Screenshots of the study stimuli are available on page 95 of this Online Supplement.

## Results

Our dependent variable of interest was whether a woman was selected in each hiring decision. We found that when participants were told that 48% of their organization's employees were women, they chose to hire women 15.7% of the time in the *isolated choice* condition and 30.5% of the time in the *collective choice* condition ( $b_{isolated\_choice} = -0.148$ ,  $SE = .036$ ,  $p < 0.001$ ; 95% CI: [-0.218, -0.078]). Meanwhile, participants who were told that 19% of the organization's employees were women chose to hire women 33.3% of the time in the *isolated choice* condition

and 29.2% of the time in the *collective choice* condition ( $b_{isolated\_choice} = 0.042$ ,  $SE = .042$ ,  $p = 0.316$ ; 95% CI: [-0.040, 0.123]).

We set out to test whether the interaction between assignment to the *isolated choice* condition and assignment to the *low diversity* condition was significant. Following our preregistered analysis plan, we ran an ordinary least squares regression with robust standard errors clustered by participant to account for the fact that participants in the *collective choice* conditions made four times as many decisions as participants in the *isolated choice* conditions. Our dependent variable was whether a female applicant was chosen in each hiring decision, and our predicted variables were an indicator variable for being in the *isolated choice* condition, an indicator variable for being in the *low diversity* condition, and an interaction between the *isolated choice* and *low diversity* condition indicators. There was a significant interaction between the *low diversity* and *isolated choice* conditions ( $b_{isolated\_choice*low\_diversity} = 0.190$ ,  $SE = .055$ ,  $p < 0.001$ ; 95% CI: [0.082, 0.297]), suggesting that being reminded that your organization has low gender diversity attenuates the isolated choice effect, perhaps because the low levels of diversity in your organization make diversity salient for all decision makers. The results also suggest that when isolated choices are contextualized in a manner that highlights the need for diversity – namely, by informing participants of their organization’s low overall levels of gender diversity – the isolated choice effect is eliminated.

#### **S4. Majority Female Paradigm.**

To test the robustness of our paradigm, we re-ran Study 1 but ‘flipped’ the genders of all candidates shown to participants. That is, we re-ran the hiring paradigm from Study 1, but each role had at least two qualified female candidates as opposed to at least two such male candidates. We predicted that participants in the *isolated choice* condition would still hire groups of candidates with less gender diversity (i.e., with fewer men) compared to groups of candidates formed by aggregating hiring decisions from participants in the *collective choice* condition. This study was preregistered on AsPredicted.org (<http://aspredicted.org/blind.php?x=4y78np>).

#### **Methods**

**Participants.** 495 U.S. participants (42.6% identified as men) were recruited through Amazon’s Mechanical Turk to participate in a short online research study. Participants were paid \$0.60 to complete a survey that took about 5 minutes to complete.

**Procedures.** We used the same study paradigm as in Study 1: participants were told we were interested in understanding how people make hiring decisions and were asked to imagine they were hiring for a technology company that was looking to fill five different roles.

Participants were randomly assigned to either the *isolated choice* condition or the *collective choice* condition. In the *isolated choice* condition, participants were told they would have to hire one person to fill one of the five roles. In the *collective choice* condition, participants were told they would have to hire five people (i.e., one person to fill each of the five roles).

Participants were then shown descriptions for each of the five roles to be filled by the organization, and in the *isolated choice* condition, we randomly assigned participants to fill one of these roles. After reading these job descriptions, participants were asked to make hiring decisions for the roles they were responsible for filling.

For each role, participants were asked to choose among three candidates who had prior work experience in a relevant job. The candidates were held constant across conditions. The three candidates always included at least two qualified women, and we included three women as candidates for one job to obscure the fact that our study was focused on gender diversity. Participants were provided with each candidate's picture (taken from the Chicago Face Database; Ma, Correll, & Wittenbrink, 2015), most recent job, and years of experience. Screenshots of the study are available on page 108 of this Online Supplement.

## Results

Our dependent variable of interest was whether a man was selected in each hiring decision. In the *isolated choice* condition, men were chosen in 3.2% of the hiring decisions; in the *collective choice* condition, men were chosen in 9.4% of the hiring decisions. Following our preregistered analysis, we ran an ordinary least squares regression with robust standard errors and errors clustered by participant to predict whether a male candidate was chosen. Our independent variable was an indicator variable for being in the *isolated choice* condition. We found that the effect of being in the *isolated choice* condition on the likelihood of selecting a male candidate was significant ( $b_{isolated\_choice} = -0.062, p < 0.01$ ), suggesting that isolated choices produced less gender diverse sets of hires than collective choices.

**Table S1: Study 1 Regression Results**

| <b>Dependent Variable:<br/>Female hired</b> |                      |
|---------------------------------------------|----------------------|
| Isolated choice condition                   | -0.106***<br>(0.026) |
| Intercept                                   | 0.179***<br>(0.018)  |
| Observations                                | 998                  |
| R <sup>2</sup>                              | 0.026                |

*Note:* This table shows the results of an ordinary least squares regression predicting whether a woman was selected in each hiring decision as a function of experimental condition. Robust standard errors clustered by participant are in parentheses.  
\*, \*\*, and \*\*\* denote significance at the 5%, 1%, and 0.1% levels, respectively.

**Table S2: Study 2 Regression Results**

| <b>Dependent Variable: Female author recommended</b> |                     |
|------------------------------------------------------|---------------------|
| Isolated choice condition                            | -0.0545*<br>(0.027) |
| Intercept                                            | 0.295***<br>(0.019) |
| Observations                                         | 598                 |
| R <sup>2</sup>                                       | 0.003               |

*Note:* This table shows the results of an ordinary least squares regression predicting whether a female author was recommended in each recommendation decision as a function of experimental condition. Robust standard errors clustered by participant are in parentheses. \*, \*\*, and \*\*\* denote significance at the 5%, 1%, and 0.1% levels, respectively.

**Table S3: Study 3A Regression Results**

| <b>Dependent Variable:<br/>Female hired</b> |                     |
|---------------------------------------------|---------------------|
| Isolated<br>choice<br>condition             | -0.058†<br>(0.030)  |
| Intercept                                   | 0.211***<br>(0.019) |
| Observations                                | 790                 |
| R <sup>2</sup>                              | 0.006               |

*Note:*

This table shows the results of an ordinary least squares regression predicting whether a woman was selected in each hiring decision as a function of experimental condition. Robust standard errors clustered by participant are in parentheses. †, \*, \*\*, and \*\*\* denote significance at the 10%, 5%, 1%, and 0.1% levels, respectively.

**Table S4: Study 3B Regression Results**

| <b>Dependent Variable:<br/>Female selected</b>       |                      |
|------------------------------------------------------|----------------------|
| Isolated choice condition                            | -0.103***<br>(0.030) |
| Diversity valued condition                           | 0.118**<br>(0.035)   |
| Isolated choice condition*Diversity valued condition | 0.098*<br>(0.045)    |
| Intercept                                            | 0.253***<br>(0.025)  |
| Observations                                         | 1587                 |
| R <sup>2</sup>                                       | 0.043                |

*Note:*

This table shows the results of an ordinary least squares regression predicting whether a woman was selected in each personnel decision as a function of assignment to the *isolated choice* condition, assignment to the *diversity values* condition, and their interaction. Robust standard errors clustered by participant are in parentheses. \*, \*\*, and \*\*\* denote significance at the 5%, 1%, and 0.1% levels, respectively.

**Table S5: Study 4B Regression Results**

| <b>Dependent Variable:<br/>Female hired</b> |                      |
|---------------------------------------------|----------------------|
| Isolated<br>choice<br>condition             | -0.163***<br>(0.027) |
| Intercept                                   | 0.473***<br>(0.027)  |
| Observations                                | 957                  |
| R <sup>2</sup>                              | 0.028                |

*Note:* This table shows the results of an ordinary least squares regression predicting whether a woman was selected in each conference speaker decision as a function of experimental condition. Robust standard errors clustered by participant are in parentheses.  
\*, \*\*, and \*\*\* denote significance at the 10%, 5%, 1%, and 0.1% levels, respectively.

## Screenshots of Study 1 Stimuli.

We are interested in how people make hiring decisions.

In this study, you will imagine that you are a hiring manager for a technology company. The company is looking to hire 5 people to fill 5 different roles: Product Manager, Software Engineer, User Experience Designer, Marketing Analyst, and Sales Representative.

>>

What are we interested in?

How people make hiring decisions

How people make decisions regarding which products to buy

How people evaluate consumer products

How people evaluate others who make certain decisions

---

How many roles is the company looking to fill?

Zero

One

Two

Three

Four

Five

>>

*Collective Choice condition:*

We are interested in how people make hiring decisions.

In this study, you will imagine that you are a hiring manager for a technology company. The company is looking to hire 5 people to fill 5 different roles: Product Manager, Software Engineer, User Experience Designer, Marketing Analyst, and Sales Representative.

You need to hire people to fill all 5 of these roles. It is your goal to hire the candidates whom you think will make the company the most successful.

A red rectangular button with rounded corners, containing a white double arrow symbol (>>) pointing to the right.

*Isolated Choice condition:*

We are interested in how people make hiring decisions.

In this study, you will imagine that you are a hiring manager for a technology company. The company is looking to hire 5 people to fill 5 different roles: Product Manager, Software Engineer, User Experience Designer, Marketing Analyst, and Sales Representative.

You need to hire someone to fill 1 of these roles. It is your goal to hire the candidate whom you think will make the company the most successful.

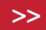

*Collective Choice condition:*

Here are the job descriptions for each of the job titles:

**Product Manager:** A product manager communicates a product vision from management to the development and implementation teams. The product manager investigates, selects, and drives the development of products for the company.

**Software Engineer:** A software engineer writes computer code to design, develop, maintain, test, and evaluate computer software.

**Marketing Analyst:** A marketing analyst gathers, records, and analyzes data about issues relating to the marketing of products and services.

**User Experience Designer:** A user experience designer enhances user satisfaction with a product by improving the usability, accessibility, and pleasure provided in the interaction with the product.

**Sales Representative:** A sales representative is responsible for selling the product to consumers and ensuring that consumers have positive experiences with the product.

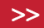

*Isolated Choice condition:*

Here are the job descriptions for each of the job titles. You will be hiring a candidate for the Marketing Analyst position:

**Marketing Analyst:** A marketing analyst gathers, records, and analyzes data about issues relating to the marketing of products and services.

**Product Manager:** A product manager communicates a product vision from management to the development and implementation teams. The product manager investigates, selects, and drives the development of products for the company.

**Software Engineer:** A software engineer writes computer code to design, develop, maintain, test, and evaluate computer software.

**User Experience Designer:** A user experience designer enhances user satisfaction with a product by improving the usability, accessibility, and pleasure provided in the interaction with the product.

**Sales Representative:** A sales representative is responsible for selling the product to consumers and ensuring that consumers have positive experiences with the product.

*Collective Choice condition:*

There are three candidates for each position. Please select your choice for each of these positions by dragging one (and only one) candidate into each of the boxes.

If you change your mind on any of your selections, you can drag the person you selected out of the box and replace them with a new candidate.



*Isolated Choice condition:*

There are three candidates for the position you need to fill (Marketing Analyst). Please select your choice for this position by dragging one (and only one) candidate into the box.

If you change your mind on your selection, you can drag the person you selected out of the box and replace them with a new candidate.

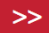

*Collective Choice condition (the screenshots below were shown on a single screen):*

There are three candidates for each position. Please select your choice for each of these positions by dragging one (and only one) candidate into each of the boxes.

If you change your mind on any of your selections, you can drag the you selected out of the box and replace them with a new candidate.

Whom would you like to hire for each of the positions?

**Items**

-   
Most recent job: Senior Product Manager at Google  
Years of experience: 5
-   
Most recent job: Product Manager at Yahoo  
Years of experience: 2
-   
Most recent job: Product Manager Intern at Google  
Years of experience: 0
-   
Most recent job: Senior Software Engineer at Square  
Years of experience: 4
-   
Most recent job: Software Engineer at Palantir  
Years of experience: 3
-   
Most recent job: Software Engineer at Zynga  
Years of experience: 2
-   
Most recent job: Marketing Analyst at Nestle  
Years of experience: 3
-   
Most recent job: Marketing Analyst at Microsoft  
Years of experience: 1
-   
Most recent job: Marketing Analyst Intern at L'Oreal  
Years of experience: 0

**Your Selection for Product Manager**

**Your Selection for Software Engineer**

**Your Selection for Marketing Analyst**

**Your Selection for User Experience Designer**

**Your Selection for Sales Representative**

-   
Most recent job: User Experience Designer at Intel  
Years of experience: 5
-   
Most recent job: User Experience Designer at BuzzFeed  
Years of experience: 3
-   
Most recent job: User Experience Designer at Facebook  
Years of experience: 1
-   
Most recent job: Sales Representative at Bloomberg  
Years of experience: 5
-   
Most recent job: Sales Representative at Salesforce  
Years of experience: 2
-   
Most recent job: Sales Representative at Apple  
Years of experience: 2

*Isolated Choice condition:*

Whom would you like to hire for the Marketing Analyst job?

**Items**

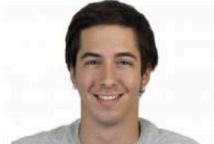

Most recent job:  
Marketing Analyst at  
Nestle  
Years of experience: 3

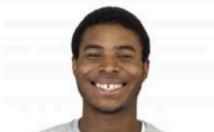

Most recent job:  
Marketing Analyst at  
Microsoft  
Years of experience: 1

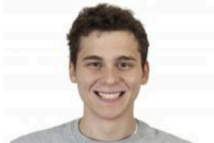

Most recent job:  
Marketing Analyst Intern  
at L'Oreal  
Years of experience: 0

**Your Selection for Marketing Analyst**

|  |
|--|
|  |
|--|

What factors did you consider when choosing who to hire?

>>

To what extent were you thinking about the diversity of the overall group of new hires when making your hiring decisions?

1: Not  
at all

2

3

4

5

6

7:  
Extremely

>>

What is your gender identity?

Man

Woman

Another identity not listed

---

This space is provided if you have any additional comments or feedback for the research team.

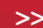

## Screenshots of Study 2 Stimuli.

We are interested in what authors people think high school students should read.

In this study, you will see a list of authors whose books are commonly read in American high schools. We will then ask you to recommend some number of authors that you think should be required for all high school students to read.

---

>>

What are we interested in?

What authors people think high school students should read

What authors people think college students should read

What authors people think are least commonly read in schools

What authors people think should be banned in schools

>>

What are we asking you to do?

Recommend some number of authors you think are already read in high school

Recommend some number of authors you think all high school students should read

Recommend some number of authors you think are too easy for high school students

Recommend some number of authors you think are too hard for high school students

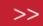

*Collective Choice condition:*

We are asking you to select 5 authors to recommend from the list we will provide you. In other words, if you were to design a high school English course, you will tell us the 5 authors you think should be required reading in the class.

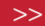

*Isolated Choice condition:*

We are asking you to select 1 author to recommend from the list we will provide you. In other words, if you were to design a high school English course, you will tell us 1 author you think should be required reading in the class.

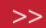

How many authors are we asking you to recommend?

0

1

2

3

4

5

>>

*Collective Choice condition:*

On the next screen, we will present you with a list of 25 authors whose books are commonly read in American high schools. You will be selecting 5 authors to recommend for inclusion in a high school English course. We would like you to select these 5 authors in the following way: rank all of the authors in your mind, and then tell us **the top 5 authors** you think should be included in a high school English course. **Please tell us your top 5 authors** by dragging and dropping 5 authors to the right-hand side of the screen.

>>

*Isolated Choice condition:*

On the next screen, we will present you with a list of 25 authors whose books are commonly read in American high schools. You will be selecting 1 author to recommend for inclusion in a high school English course. We would like you to select this 1 author in the following way: rank all of the authors in your mind, and then tell us **the #3 author** you think should be included in a high school English course. **Please tell us your #3 ranked author** by dragging and dropping this author to the right-hand side of the screen.

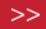



*Isolated Choice condition (the screenshots below were shown on a single screen):*

Here is a list of 25 authors whose books are commonly read in American high schools. Please tell us which author you think should be **ranked #3** in a list of authors you would recommend including in a high school English course. If you make a mistake, you can drag the authors back to the left. (Ignore the red number next to the author you select—we want you to tell us your #3 author!)

Items

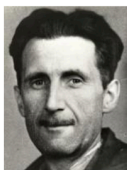

George Orwell

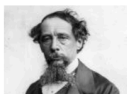

Charles Dickens

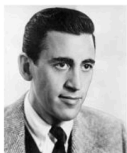

J.D. Salinger

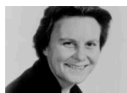

Harper Lee

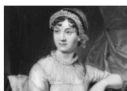

Jane Austen

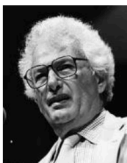

Joseph Heller

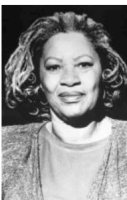

Toni Morrison

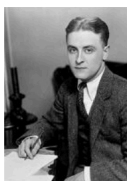

F. Scott Fitzgerald

The #3 Author You Think Should Be Included in a High School English Course

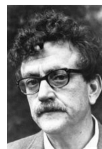

Kurt Vonnegut

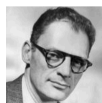

Arthur Miller

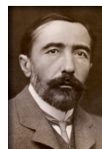

Joseph Conrad

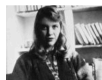

Sylvia Plath

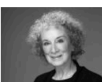

Margaret Atwood

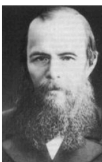

Fyodor Dostoyevsky

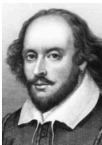

William Shakespeare

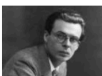

Aldous Huxley

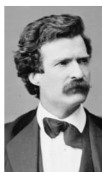

Mark Twain

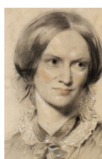

Charlotte Bronte

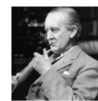

J.R.R. Tolkien

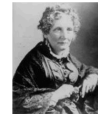

Harriet Beecher Stowe

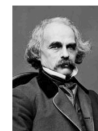

Nathaniel Hawthorne

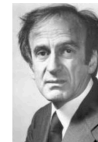

Elie Wiesel

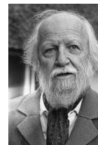

William Golding

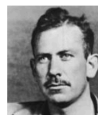

John Steinbeck

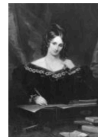

Mary Shelley

What is your gender identity?

Man

Woman

Another identity not listed

---

This space is provided if you have any additional comments or feedback for the research team.

>>

### Screenshots of Study 3A Stimuli

We are interested in how people make hiring decisions.

In this study, you will imagine that you are a hiring manager for a technology company. The company is looking to hire a new tech team. Hiring a new tech team involves hiring 5 people to fill 5 different roles on the team: Product Manager, Software Engineer, User Experience Designer, Marketing Analyst, and Sales Representative.

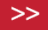

What are we interested in?

How people evaluate others who make certain decisions

How people make hiring decisions

How people evaluate consumer products

How people make decisions regarding which products to buy

How many roles is the company looking to fill?

Zero

One

Two

Three

Four

Five

Who is the company looking to hire?

A new CEO

A tech team

A writing team

You

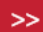

*Collective Choice condition:*

We are interested in how people make hiring decisions.

In this study, you will imagine that you are a hiring manager for a technology company. The company is looking to hire a new tech team. Hiring a new tech team involves hiring 5 people to fill 5 different roles on the team: Product Manager, Software Engineer, User Experience Designer, Marketing Analyst, and Sales Representative.

You need to hire people to fill all 5 of these roles. It is your goal to hire the candidates whom you think will make the company and team the most successful.

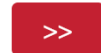

*Isolated Choice condition:*

We are interested in how people make hiring decisions.

In this study, you will imagine that you are a hiring manager for a technology company. The company is looking to hire a new tech team. Hiring a new tech team involves hiring 5 people to fill 5 different roles on the team: Product Manager, Software Engineer, User Experience Designer, Marketing Analyst, and Sales Representative.

You need to hire someone to fill 1 of these roles. It is your goal to hire the candidate whom you think will make the company and team the most successful.

A red rectangular button with rounded corners, containing a white double arrow symbol (>>).

*Collective Choice condition:*

Here are the job descriptions for each of the job titles:

**Product Manager:** A product manager communicates a product vision from management to the development and implementation teams. The product manager investigates, selects, and drives the development of products for the company.

**Software Engineer:** A software engineer writes computer code to design, develop, maintain, test, and evaluate computer software.

**Marketing Analyst:** A marketing analyst gathers, records, and analyzes data about issues relating to the marketing of products and services.

**User Experience Designer:** A user experience designer enhances user satisfaction with a product by improving the usability, accessibility, and pleasure provided in the interaction with the product.

**Sales Representative:** A sales representative is responsible for selling the product to consumers and ensuring that consumers have positive experiences with the product.

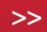

*Isolated Choice condition:*

Here are the job descriptions for each of the job titles. You will be hiring a candidate for the User Experience Designer position:

**User Experience Designer:** A user experience designer enhances user satisfaction with a product by improving the usability, accessibility, and pleasure provided in the interaction with the product.

**Product Manager:** A product manager communicates a product vision from management to the development and implementation teams. The product manager investigates, selects, and drives the development of products for the company.

**Software Engineer:** A software engineer writes computer code to design, develop, maintain, test, and evaluate computer software.

**Marketing Analyst:** A marketing analyst gathers, records, and analyzes data about issues relating to the marketing of products and services.

**Sales Representative:** A sales representative is responsible for selling the product to consumers and ensuring that consumers have positive experiences with the product.

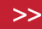

*Collective Choice condition (the screenshots below were shown on a single screen):*

There are three candidates for each position on the tech team. Please select your choice for each of these positions by dragging one (and only one) candidate into each of the boxes.

If you change your mind on any of your selections, you can drag the you selected out of the box and replace them with a new candidate.

Whom would you like to hire for each of the positions?

**Items**

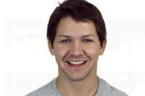

Most recent job: Senior Product Manager at Google  
Years of experience: 5

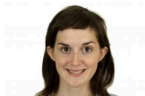

Most recent job: Product Manager at Yahoo  
Years of experience: 2

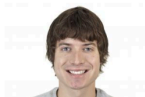

Most recent job: Product Manager Intern at Google  
Years of experience: 0

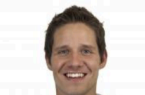

Most recent job: Senior Software Engineer at Square  
Years of experience: 4

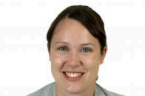

Most recent job: Software Engineer at Palantir  
Years of experience: 3

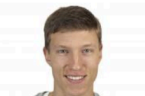

Most recent job: Software Engineer at Zynga  
Years of experience: 2

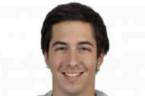

Most recent job: Marketing Analyst at Nestle  
Years of experience: 3

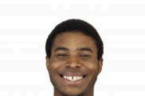

Most recent job: Marketing Analyst at Microsoft  
Years of experience: 1

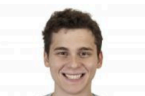

Most recent job: Marketing Analyst Intern at L'Oreal  
Years of experience: 0

**Your Selection for Product Manager**

**Your Selection for Software Engineer**

**Your Selection for Marketing Analyst**

**Your Selection for User Experience Designer**

**Your Selection for Sales Representative**

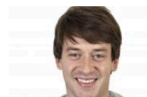

Most recent job: User Experience Designer at Intel  
Years of experience: 5

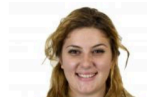

Most recent job: User Experience Designer at BuzzFeed  
Years of experience: 3

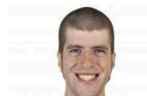

Most recent job: User Experience Designer at Facebook  
Years of experience: 1

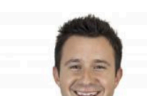

Most recent job: Sales Representative at Bloomberg  
Years of experience: 5

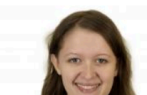

Most recent job: Sales Representative at Salesforce  
Years of experience: 2

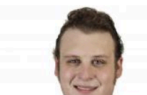

Most recent job: Sales Representative at Apple  
Years of experience: 2

*Isolated Choice condition:*

There are three candidates for the position you need to fill (User Experience Designer) on the tech team. Please select your choice for this position by dragging one (and only one) candidate into the box.

If you change your mind on your selection, you can drag the person you selected out of the box and replace them with a new candidate.

Whom would you like to hire for the User Experience Designer job?

**Items**

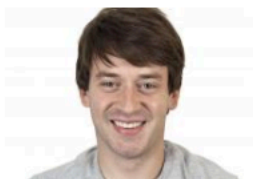

Most recent job: User Experience Designer at Intel

Years of experience: 5

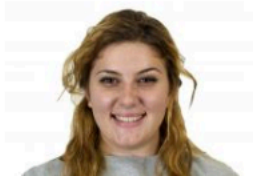

Most recent job: User Experience Designer at BuzzFeed

Years of experience: 3

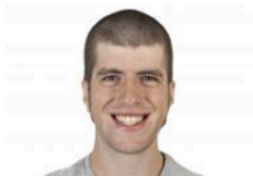

Most recent job: User Experience Designer at Facebook

Years of experience: 1

**Your Selection for User Experience Designer**

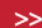

*Collective Choice condition:*

To what extent do you agree with the following statement?

I considered how my choices would influence the diversity of the tech team hired when making my decisions.

1: Not  
at all

2

3

4

5

6

7:  
Extremely

>>

*Isolated Choice condition:*

To what extent do you agree with the following statement?

I considered how my choice would influence the diversity of the tech team hired when making my decision.

|                  |   |   |   |   |   |                 |
|------------------|---|---|---|---|---|-----------------|
| 1: Not<br>at all | 2 | 3 | 4 | 5 | 6 | 7:<br>Extremely |
|------------------|---|---|---|---|---|-----------------|

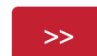

What is your gender identity?

Man

Woman

Another identity not listed

---

This space is provided if you have any additional comments or feedback for the research team.

>>

### Screenshots of Study 3B Stimuli

We are interested in how people make hiring decisions.

In this study, you will imagine that you are a hiring manager for a technology company. The company is looking to hire a new tech team. Hiring a new tech team involves hiring 5 people to fill 5 different roles on the team: Product Manager, Software Engineer, User Experience Designer, Marketing Analyst, and Sales Representative.

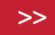

What are we interested in?

How people evaluate others who make certain decisions

How people make hiring decisions

How people evaluate consumer products

How people make decisions regarding which products to buy

How many roles is the company looking to fill?

Zero

One

Two

Three

Four

Five

Who is the company looking to hire?

A new CEO

A tech team

A writing team

You

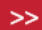

*Collective Choice condition, Diversity Values condition:*

We are interested in how people make hiring decisions.

In this study, you will imagine that you are a hiring manager for a technology company. The company is looking to hire a new tech team. Hiring a new tech team involves hiring 5 people to fill 5 different roles on the team: Product Manager, Software Engineer, User Experience Designer, Marketing Analyst, and Sales Representative.

You need to hire people to fill all 5 of these roles. It is your goal to hire the candidates whom you think will make the company and team the most successful. **The company strongly values diversity.**

>>

*Collective Choice condition, No Values Control condition:*

We are interested in how people make hiring decisions.

In this study, you will imagine that you are a hiring manager for a technology company. The company is looking to hire a new tech team. Hiring a new tech team involves hiring 5 people to fill 5 different roles on the team: Product Manager, Software Engineer, User Experience Designer, Marketing Analyst, and Sales Representative.

You need to hire people to fill all 5 of these roles. It is your goal to hire the candidates whom you think will make the company and team the most successful.

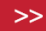

*Isolated Choice condition, Diversity Values condition:*

We are interested in how people make hiring decisions.

In this study, you will imagine that you are a hiring manager for a technology company. The company is looking to hire a new tech team. Hiring a new tech team involves hiring 5 people to fill 5 different roles on the team: Product Manager, Software Engineer, User Experience Designer, Marketing Analyst, and Sales Representative.

You need to hire someone to fill 1 of these roles. It is your goal to hire the candidate whom you think will make the company and team the most successful. **The company strongly values diversity.**

>>

*Isolated Choice condition, No Values Control condition:*

We are interested in how people make hiring decisions.

In this study, you will imagine that you are a hiring manager for a technology company. The company is looking to hire a new tech team. Hiring a new tech team involves hiring 5 people to fill 5 different roles on the team: Product Manager, Software Engineer, User Experience Designer, Marketing Analyst, and Sales Representative.

You need to hire someone to fill 1 of these roles. It is your goal to hire the candidate whom you think will make the company and team the most successful.

>>

*Collective Choice condition:*

Here are the job descriptions for each of the job titles:

**Product Manager:** A product manager communicates a product vision from management to the development and implementation teams. The product manager investigates, selects, and drives the development of products for the company.

**Software Engineer:** A software engineer writes computer code to design, develop, maintain, test, and evaluate computer software.

**Marketing Analyst:** A marketing analyst gathers, records, and analyzes data about issues relating to the marketing of products and services.

**User Experience Designer:** A user experience designer enhances user satisfaction with a product by improving the usability, accessibility, and pleasure provided in the interaction with the product.

**Sales Representative:** A sales representative is responsible for selling the product to consumers and ensuring that consumers have positive experiences with the product.



*Isolated Choice condition:*

Here are the job descriptions for each of the job titles. You will be hiring a candidate for the User Experience Designer position:

**User Experience Designer:** A user experience designer enhances user satisfaction with a product by improving the usability, accessibility, and pleasure provided in the interaction with the product.

**Product Manager:** A product manager communicates a product vision from management to the development and implementation teams. The product manager investigates, selects, and drives the development of products for the company.

**Software Engineer:** A software engineer writes computer code to design, develop, maintain, test, and evaluate computer software.

**Marketing Analyst:** A marketing analyst gathers, records, and analyzes data about issues relating to the marketing of products and services.

**Sales Representative:** A sales representative is responsible for selling the product to consumers and ensuring that consumers have positive experiences with the product.



Collective Choice condition, Diversity Values condition (the screenshots below were shown on a single screen):

There are three candidates for each position on the tech team. Please select your choice for each of these positions by dragging one (and only one) candidate into each of the boxes. Please ONLY drag candidates who are qualified for each position into a given box.

If you change your mind on any of your selections, you can drag the you selected out of the box and replace them with a new candidate.

Remember, the company strongly values diversity. Whom would you like to hire for each of the positions?

**Items**

**Product Manager Candidate 1:**  
  
 Most recent job: Senior Product Manager at Google  
 Years of experience: 5

**Product Manager Candidate 2:**  
  
 Most recent job: Product Manager at Yahoo  
 Years of experience: 2

**Product Manager Candidate 3:**  
  
 Most recent job: Product Manager Intern at Google  
 Years of experience: 0

**Your Selection for Product Manager**

**Your Selection for Software Engineer**

**Your Selection for Marketing Analyst**

**Your Selection for User Experience Designer**

**Marketing Analyst Candidate 2:**  
  
 Most recent job: Marketing Analyst at Microsoft  
 Years of experience: 1

**Marketing Analyst Candidate 3:**  
  
 Most recent job: Marketing Analyst Intern at L'Oreal  
 Years of experience: 0

**User Experience Designer Candidate 1:**  
  
 Most recent job: User Experience Designer at Intel  
 Years of experience: 5

**User Experience Designer Candidate 2:**  
  
 Most recent job: User Experience Designer at BuzzFeed  
 Years of experience: 3

**Software Engineer Candidate 1:**  
  
 Most recent job: Senior Software Engineer at Square  
 Years of experience: 4

**Software Engineer Candidate 2:**  
  
 Most recent job: Software Engineer at Palantir  
 Years of experience: 3

**Software Engineer Candidate 3:**  
  
 Most recent job: Software Engineer at Zynga  
 Years of experience: 2

**Marketing Analyst Candidate 1:**  
  
 Most recent job: Marketing Analyst at Nestle  
 Years of experience: 3

**Your Selection for Sales Representative**

**User Experience Designer Candidate 3:**  
  
 Most recent job: User Experience Designer at Facebook  
 Years of experience: 1

**Sales Representative Candidate 1:**  
  
 Most recent job: Sales Representative at Bloomberg  
 Years of experience: 5

**Sales Representative Candidate 2:**  
  
 Most recent job: Sales Representative at Salesforce  
 Years of experience: 2

**Sales Representative Candidate 3:**  
  
 Most recent job: Sales Representative at Apple  
 Years of experience: 2

*Collective Choice condition, No Values Control condition (the screenshots below were shown on a single screen):*

There are three candidates for each position on the tech team. Please select your choice for each of these positions by dragging one (and only one) candidate into each of the boxes.

If you change your mind on any of your selections, you can drag the you selected out of the box and replace them with a new candidate.

Whom would you like to hire for each of the positions?

|                                                                                                                                                                                                                                                                                                                                                                                                                                                                                                                                                                                                                                                                                                                                                                                                                                                                                                                                                                                                                                                                                                                                                                                                                                                                                                                                                                                                                                                                                                                                         |                                                                                                                                                                                                                                                                                                                                                                                                                                                                                                                                                                                                        |                                                                                                                                                                                                                                                                                                                                                                                                                                                                                                                                                                                                                                                                                                                                                                                                                                                                                                                                                                                                                                                                                                                                                                                                                                                                                                                                                                                                                                                                                                                                                                                                                                                                                                                                                                                                           |
|-----------------------------------------------------------------------------------------------------------------------------------------------------------------------------------------------------------------------------------------------------------------------------------------------------------------------------------------------------------------------------------------------------------------------------------------------------------------------------------------------------------------------------------------------------------------------------------------------------------------------------------------------------------------------------------------------------------------------------------------------------------------------------------------------------------------------------------------------------------------------------------------------------------------------------------------------------------------------------------------------------------------------------------------------------------------------------------------------------------------------------------------------------------------------------------------------------------------------------------------------------------------------------------------------------------------------------------------------------------------------------------------------------------------------------------------------------------------------------------------------------------------------------------------|--------------------------------------------------------------------------------------------------------------------------------------------------------------------------------------------------------------------------------------------------------------------------------------------------------------------------------------------------------------------------------------------------------------------------------------------------------------------------------------------------------------------------------------------------------------------------------------------------------|-----------------------------------------------------------------------------------------------------------------------------------------------------------------------------------------------------------------------------------------------------------------------------------------------------------------------------------------------------------------------------------------------------------------------------------------------------------------------------------------------------------------------------------------------------------------------------------------------------------------------------------------------------------------------------------------------------------------------------------------------------------------------------------------------------------------------------------------------------------------------------------------------------------------------------------------------------------------------------------------------------------------------------------------------------------------------------------------------------------------------------------------------------------------------------------------------------------------------------------------------------------------------------------------------------------------------------------------------------------------------------------------------------------------------------------------------------------------------------------------------------------------------------------------------------------------------------------------------------------------------------------------------------------------------------------------------------------------------------------------------------------------------------------------------------------|
| <p><b>Items</b></p> <p><b>Product Manager Candidate 1:</b></p>  <p>Most recent job: Senior Product Manager at Google<br/>Years of experience: 5</p> <p><b>Product Manager Candidate 2:</b></p>  <p>Most recent job: Product Manager at Yahoo<br/>Years of experience: 2</p> <p><b>Product Manager Candidate 3:</b></p>  <p>Most recent job: Product Manager Intern at Google<br/>Years of experience: 0</p> <p><b>Software Engineer Candidate 1:</b></p>  <p>Most recent job: Senior Software Engineer at Square<br/>Years of experience: 4</p> <p><b>Software Engineer Candidate 2:</b></p>  <p>Most recent job: Software Engineer at Palantir<br/>Years of experience: 3</p> <p><b>Software Engineer Candidate 3:</b></p>  <p>Most recent job: Software Engineer at Zynga<br/>Years of experience: 2</p> <p><b>Marketing Analyst Candidate 1:</b></p>  <p>Most recent job: Marketing Analyst at Nestle<br/>Years of experience: 3</p> | <div style="border: 1px solid #ccc; padding: 5px; margin-bottom: 10px;">Your Selection for Product Manager</div> <div style="border: 1px solid #ccc; padding: 5px; margin-bottom: 10px;">Your Selection for Software Engineer</div> <div style="border: 1px solid #ccc; padding: 5px; margin-bottom: 10px;">Your Selection for Marketing Analyst</div> <div style="border: 1px solid #ccc; padding: 5px; margin-bottom: 10px;">Your Selection for User Experience Designer</div> <div style="border: 1px solid #ccc; padding: 5px; margin-bottom: 10px;">Your Selection for Sales Representative</div> | <p><b>Marketing Analyst Candidate 2:</b></p>  <p>Most recent job: Marketing Analyst at Microsoft<br/>Years of experience: 1</p> <p><b>Marketing Analyst Candidate 3:</b></p>  <p>Most recent job: Marketing Analyst Intern at L'Oreal<br/>Years of experience: 0</p> <p><b>User Experience Designer Candidate 1:</b></p>  <p>Most recent job: User Experience Designer at Intel<br/>Years of experience: 5</p> <p><b>User Experience Designer Candidate 2:</b></p>  <p>Most recent job: User Experience Designer at BuzzFeed<br/>Years of experience: 3</p> <p><b>User Experience Designer Candidate 3:</b></p>  <p>Most recent job: User Experience Designer at Facebook<br/>Years of experience: 1</p> <p><b>Sales Representative Candidate 1:</b></p>  <p>Most recent job: Sales Representative at Bloomberg<br/>Years of experience: 5</p> <p><b>Sales Representative Candidate 2:</b></p>  <p>Most recent job: Sales Representative at Salesforce<br/>Years of experience: 2</p> <p><b>Sales Representative Candidate 3:</b></p>  <p>Most recent job: Sales Representative at Apple<br/>Years of experience: 2</p> |
|-----------------------------------------------------------------------------------------------------------------------------------------------------------------------------------------------------------------------------------------------------------------------------------------------------------------------------------------------------------------------------------------------------------------------------------------------------------------------------------------------------------------------------------------------------------------------------------------------------------------------------------------------------------------------------------------------------------------------------------------------------------------------------------------------------------------------------------------------------------------------------------------------------------------------------------------------------------------------------------------------------------------------------------------------------------------------------------------------------------------------------------------------------------------------------------------------------------------------------------------------------------------------------------------------------------------------------------------------------------------------------------------------------------------------------------------------------------------------------------------------------------------------------------------|--------------------------------------------------------------------------------------------------------------------------------------------------------------------------------------------------------------------------------------------------------------------------------------------------------------------------------------------------------------------------------------------------------------------------------------------------------------------------------------------------------------------------------------------------------------------------------------------------------|-----------------------------------------------------------------------------------------------------------------------------------------------------------------------------------------------------------------------------------------------------------------------------------------------------------------------------------------------------------------------------------------------------------------------------------------------------------------------------------------------------------------------------------------------------------------------------------------------------------------------------------------------------------------------------------------------------------------------------------------------------------------------------------------------------------------------------------------------------------------------------------------------------------------------------------------------------------------------------------------------------------------------------------------------------------------------------------------------------------------------------------------------------------------------------------------------------------------------------------------------------------------------------------------------------------------------------------------------------------------------------------------------------------------------------------------------------------------------------------------------------------------------------------------------------------------------------------------------------------------------------------------------------------------------------------------------------------------------------------------------------------------------------------------------------------|

*Isolated Choice condition, Diversity Values condition:*

There are three candidates for the position you need to fill (Sales Representative) on the tech team. Please select your choice for this position by dragging one (and only one) candidate into the box.

If you change your mind on your selection, you can drag the person you selected out of the box and replace them with a new candidate.

Remember, the company strongly values diversity. Whom would you like to hire for the Sales Representative job?

**Items**

**Sales Representative  
Candidate 1:**

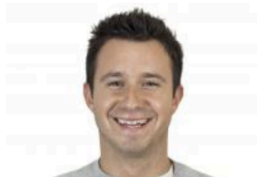

Most recent job: Sales  
Representative at  
Bloomberg  
Years of experience: 5

**Sales Representative  
Candidate 2:**

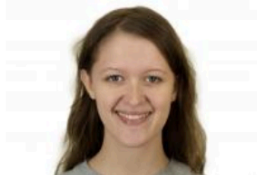

Most recent job: Sales  
Representative at  
Salesforce  
Years of experience: 2

**Sales Representative  
Candidate 3:**

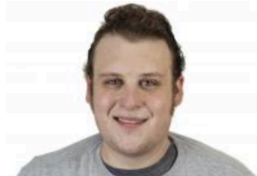

Most recent job: Sales  
Representative at Apple  
Years of experience: 2

**Your Selection for Sales  
Representative**

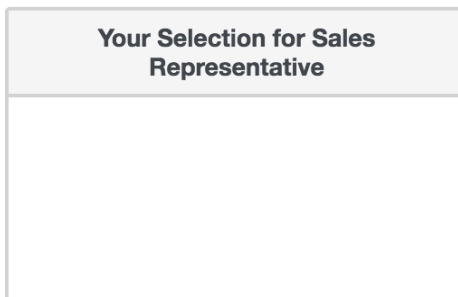

*Isolated Choice condition, No Values Control condition:*

There are three candidates for the position you need to fill (Software Engineer) on the tech team. Please select your choice for this position by dragging one (and only one) candidate into the box.

If you change your mind on your selection, you can drag the person you selected out of the box and replace them with a new candidate.

Whom would you like to hire for the Software Engineer job?

### Items

#### Software Engineer Candidate 1:

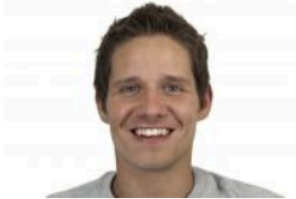

Most recent job: Senior  
Software Engineer at  
Square  
Years of experience: 4

#### Software Engineer Candidate 2:

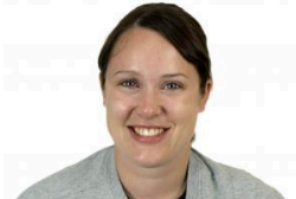

Most recent job: Software  
Engineer at Palantir  
Years of experience: 3

#### Software Engineer Candidate 3:

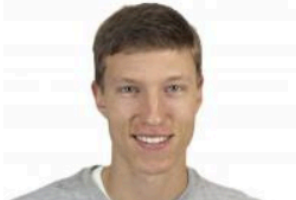

Most recent job: Software  
Engineer at Zynga  
Years of experience: 2

### Your Selection for Software Engineer

*Manipulation Check*

Based on what we told you about the organization you are hiring for, please rate your agreement with the following statement:

The company strongly values diversity

1: Strongly disagree

2: Disagree

3: Neither agree nor disagree

4: Agree

5: Strongly agree

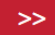

What is your gender identity?

Man

Woman

Another identity not listed

---

This space is provided if you have any additional comments or feedback for the research team.

>>

### Screenshots of Study 4A Stimuli.

*Text identifying where this study took place has been blocked out to preserve the anonymity of the review process.*

We are interested in how people make hiring decisions.

In this study, you will hire some number of people for a **team**. We will provide you with information about these people, and you will choose to hire some of them for your team. **Your team will then work together to come up with a business idea, and they will write a pitch for their idea.**

Each team will work together to present their ideas in a pitch competition that will be held at [REDACTED] this month. The business pitches will be judged by a panel of [REDACTED] professors and [REDACTED] graduate students, who will decide which business idea is the best. **If your team wins the pitch competition, you will earn a \$1 bonus.**

**The winners of the pitch competition will be posted on a [REDACTED] website.**

There is no deception in this study: all information about the [REDACTED] candidates you are hiring is truthful, and your decisions will affect the bonus you receive based on your team's performance in the pitch competition.

A red rectangular button with white double arrow symbols (>>) pointing to the right.

Can you earn a bonus in this study?

No, there are no bonuses in this study

Yes, based on the quality of the business idea I come up with by myself

Yes, based on how old I am

Yes, based on whether the team I hire wins the pitch competition

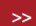

Will the winning team be publicized in any way?

No, the pitch competition and its results are private

Kind of, the pitch competition is open to the public, but the results won't be publicized

Yes, the winning team will be posted on a [REDACTED] website

No, [REDACTED] doesn't want to make a big deal out of this

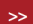

What are you hiring people to do for you?

Hire other people

Form a company

Come up with a business idea and pitch as a team

Answer trivia questions at a competition

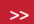

To help you decide whom to hire, we will show you some information about each of the candidates you can hire and their qualifications. Each pitch team will include three people: a team manager, a financial analyst, and a brand manager.

The **team manager** will be responsible for leading the team, the **financial analyst** will be responsible for ensuring that the business plan is financially viable, and the **brand manager** will be responsible for a marketing plan.

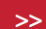

To ensure that you understand the instructions so far, we are going to ask you some questions about a hypothetical scenario:

Imagine that you are choosing between Candidate A and Candidate B to add to your team as a brand manager.

Candidate A specializes in marketing at [REDACTED].

Candidate B specializes in finance at [REDACTED].

---

If you were to hire Candidate A, what would your bonus be based off of?

Their individual performance in the pitch competition

Their marketing grades at [REDACTED]

Neither. The bonus is based on whether the team that Candidate A is on wins the pitch competition.

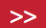

*Collective Choice condition:*

To help you decide whom to hire, we will show you some information about each of the candidates you can hire and their qualifications. Each pitch team will include three people: a team manager, a financial analyst, and a brand manager.

The **team manager** will be responsible for leading the team, the **financial analyst** will be responsible for ensuring that the business plan is financially viable, and the **brand manager** will be responsible for a marketing plan.

You will hire three people to join your team as team manager, financial analyst, and brand manager. You must hire **one** person for **each** team role, and you can **only** hire people who are candidates for that role. If you hire someone for the wrong role, you will receive no bonus. So, if John has applied to be team manager and you hire him for the brand manager position instead, you will NOT get a bonus. If your team wins the pitch competition, you will earn a \$1 bonus.

Whom would you like to hire for your pitch team? Please drag **one** candidate on the left from **each** category into the appropriate box on the right.

*Isolated Choice condition:*

To help you decide whom to hire, we will show you some information about each of the candidates you can hire and their qualifications. Each pitch team will include three people: a team manager, a financial analyst, and a brand manager.

The **team manager** will be responsible for leading the team, the **financial analyst** will be responsible for ensuring that the business plan is financially viable, and the **brand manager** will be responsible for a marketing plan.

You will hire one person to join a team as the **team manager**. If the team that this person joins wins the pitch competition, you will earn a \$1 bonus.

Whom would you like to hire for your pitch team? Please drag one candidate on the left into the box on the right.

Collective Choice condition (the screenshots below were shown on a single screen):

**Note: This screenshot has been modified to protect the anonymity of the review process by replacing the names of scientists used in the study with aliases. The photos have been modified because we do not have permission to reprint the professional photos of people used as stimuli.**

|                                                                                     |                                        |                                                                                                    |                                                                                       |
|-------------------------------------------------------------------------------------|----------------------------------------|----------------------------------------------------------------------------------------------------|---------------------------------------------------------------------------------------|
| <p>Items<br/><u>Team Manager Candidate 1</u></p>                                    | <p>Your Selection for Team Manager</p> | <p><u>Brand Manager Candidate 1</u></p>                                                            | <p><u>Financial Analyst Candidate 1</u></p>                                           |
|    |                                        |                   |    |
| <p>Name: Mario<br/>Years at [redacted]: 2<br/>Specialty: Marketing</p>              | <p>Real photos used in survey</p>      | <p>Name: Paul<br/>Years at [redacted]: 3<br/>Specialty: Management and Organizational Behavior</p> | <p>Name: Smith<br/>Years at [redacted]: 4<br/>Specialty: Information Systems</p>      |
| <p><u>Team Manager Candidate 2</u></p>                                              |                                        | <p><u>Brand Manager Candidate 2</u></p>                                                            | <p><u>Financial Analyst Candidate 2</u></p>                                           |
|    |                                        |                   |    |
| <p>Name: Anna<br/>Years at [redacted]: 2<br/>Specialty: Behavioral Science</p>      |                                        | <p>Name: Nick<br/>Years at [redacted]: 3<br/>Specialty: Management and Organizational Behavior</p> | <p>Name: John<br/>Years at [redacted]: 4<br/>Specialty: Decisions Research</p>        |
| <p><u>Team Manager Candidate 3</u></p>                                              |                                        | <p><u>Brand Manager Candidate 3</u></p>                                                            | <p><u>Financial Analyst Candidate 3</u></p>                                           |
|  |                                        |                 |  |
| <p>Name: Bob<br/>Years at [redacted]: 1<br/>Specialty: Operations Management</p>    |                                        | <p>Name: Rob<br/>Years at [redacted]: 9 months<br/>Specialty: Behavioral Science</p>               | <p>Name: Richard<br/>Years at [redacted]: 1<br/>Specialty: Behavioral Science</p>     |

*Isolated Choice condition:*

**Note: This screenshot has been modified to protect the anonymity of the review process by replacing the names of scientists used in the study with aliases. The photos have been modified because we do not have permission to reprint the professional photos of people used as stimuli.**

| Items                                                                                                                                                                                                                                                                   | Your Selection for Team Manager |
|-------------------------------------------------------------------------------------------------------------------------------------------------------------------------------------------------------------------------------------------------------------------------|---------------------------------|
| <p data-bbox="305 506 456 554"><b>Team Manager Candidate 1</b></p>  <p data-bbox="282 848 477 919">Name: Mario<br/>Years at [redacted]: 2<br/>Specialty: Marketing</p>                 |                                 |
| <p data-bbox="305 947 456 995"><b>Team Manager Candidate 2</b></p>  <p data-bbox="282 1194 477 1287">Name: Anna<br/>Years at [redacted]: 2<br/>Specialty: Behavioral Science</p>     |                                 |
| <p data-bbox="305 1314 456 1362"><b>Team Manager Candidate 3</b></p>  <p data-bbox="282 1625 477 1722">Name: Bob<br/>Years at [redacted]: 1<br/>Specialty: Operations Management</p> |                                 |

Real photos used in survey

What is your gender identity?

Man

Woman

Another identity not listed

---

This space is provided if you have any additional comments or feedback for the research team.

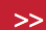

**Screenshots of Study 4B Stimuli.**

We work at [REDACTED] the business school of [REDACTED] We are planning a one-day conference that will be held at [REDACTED] next year. At the conference, we will have various speakers share their thoughts and research about the science behind [REDACTED]

We would like your opinions about whom we should invite to speak at the conference.

 >>

What topic will speakers be talking about?

The science behind hearing aids

The science behind

The science behind sodium batteries

The science behind personal genomics

>>

What do we want your opinion on?

Which person we should nominate for an award

Which speakers we should invite to talk at a conference

What we should change our school motto to be

Which building on our campus we should rename

>>

We work at [REDACTED] the business school of [REDACTED]. We are planning a one-day conference that will be held at [REDACTED] next year. At the conference, we will have various speakers share their thoughts and research about the science behind [REDACTED].

We would like your opinions about whom we should invite to speak at the conference.

The speakers will come together to present their perspectives on the focus areas of the conference: Energy, Health, Financial Literacy, Education, and Conflict Management.

To help you decide whom to recommend, we will show you some information about each of the candidates you can recommend as a speaker and their qualifications. The speakers will include at least one candidate from each of the focus areas: Energy, Health, Financial Literacy, Education, and Conflict Management.

**We will invite the most frequently chosen people to the conference.**

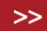

*Collective Choice condition:*

We are planning a one-day conference that will be held at [REDACTED] next year. At the conference, we will have various speakers share their thoughts and research about the science behind persistent behavior change.

We are asking you to help us select the group of speakers for the conference.

You will recommend five people to join the speaking team as a representative from each of the five focus areas: Energy, Health, Financial Literacy, Education, and Civic Engagement. **Your recommendations will actually help determine whom we invite to the conference.**

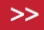

*Isolated Choice condition:*

We are planning a one-day conference that will be held at [REDACTED] next year. At the conference, we will have various speakers share their thoughts and research about the science behind persistent behavior change.

We are asking you to help us select the group of speakers for the conference.

You will recommend one person to join the speaking team as a representative from the Financial Literacy focus area. **Your recommendation will actually help determine whom we invite to the conference.**

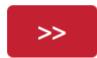

*Collective Choice condition (the screenshots below were shown on a single screen):*

**Note: This screenshot has been modified to protect the anonymity of the review process by replacing the names of scientists used in the study with aliases. The photos have been modified because we do not have permission to reprint the professional photos of people used as stimuli.**

You will recommend five people to join the speaking team as a representative from each of the five focus areas: Energy, Health, Financial Literacy, Education, and Civic Engagement. Your recommendations will actually help determine whom we invite to the conference.

Whom would you like to recommend to speak about **Financial Literacy** at the conference?

| Financial Literacy Candidate 1                                                                              | Financial Literacy Candidate 2                                                                                        | Financial Literacy Candidate 3                                                                            |
|-------------------------------------------------------------------------------------------------------------|-----------------------------------------------------------------------------------------------------------------------|-----------------------------------------------------------------------------------------------------------|
|                            |                                      |                          |
| Professor Val Adictorian<br>School: Northwestern University<br>Years of Experience: 17<br>Impact factor: 58 | Professor Marsha Mellow<br>School: University of California, Berkeley<br>Years of Experience: 17<br>Impact factor: 32 | Professor Cooke Edoh<br>School: Carnegie Mellon University<br>Years of Experience: 5<br>Impact factor: 13 |

Whom would you like to recommend to speak about **Conflict Management** at the conference?

| Conflict Management Candidate 1                                                         | Conflict Management Candidate 2                                                                            | Conflict Management Candidate 3                                                                          |
|-----------------------------------------------------------------------------------------|------------------------------------------------------------------------------------------------------------|----------------------------------------------------------------------------------------------------------|
|        |                         |                       |
| Professor Chris P. Cream<br>School: MIT<br>Years of Experience: 10<br>Impact factor: 53 | Professor Carrie R. Pigeon<br>School: Princeton University<br>Years of Experience: 12<br>Impact factor: 25 | Professor Earl E. Riser<br>School: University of Chicago<br>Years of Experience: 11<br>Impact factor: 15 |

Whom would you like to recommend to speak about **Health** at the conference?

| Health Candidate 1                                                                                             | Health Candidate 2                                                                                         | Health Candidate 3                                                                                           |
|----------------------------------------------------------------------------------------------------------------|------------------------------------------------------------------------------------------------------------|--------------------------------------------------------------------------------------------------------------|
|                              |                          |                            |
| Professor Terry Torial<br>School: University of Texas at Austin<br>Years of Experience: 8<br>Impact factor: 33 | Professor Vinny Gret<br>School: University of Pennsylvania<br>Years of Experience: 10<br>Impact factor: 27 | Professor Paul Samic<br>School: University of North Carolina<br>Years of Experience: 10<br>Impact factor: 25 |

Whom would you like to recommend to speak about **Energy** at the conference?

| Energy Candidate 1                                                                                                 | Energy Candidate 2                                                                              | Energy Candidate 3                                                                                     |
|--------------------------------------------------------------------------------------------------------------------|-------------------------------------------------------------------------------------------------|--------------------------------------------------------------------------------------------------------|
|                                  |             |                    |
| Professor Aaron Spacemuseum<br>School: Carnegie Mellon University<br>Years of Experience: 34<br>Impact factor: 132 | Professor Dan Delion<br>School: Duke University<br>Years of Experience: 28<br>Impact factor: 36 | Professor Pete Attricks<br>School: New York University<br>Years of Experience: 10<br>Impact factor: 27 |

Whom would you like to recommend to speak about **Education** at the conference?

| Education Candidate 1                                                                            | Education Candidate 2                                                                               | Education Candidate 3                                                                                   |
|--------------------------------------------------------------------------------------------------|-----------------------------------------------------------------------------------------------------|---------------------------------------------------------------------------------------------------------|
|               |                  |                      |
| Professor Sven Gineer<br>School: Duke University<br>Years of Experience: 31<br>Impact factor: 64 | Professor Lou Tenant<br>School: New York University<br>Years of Experience: 30<br>Impact factor: 57 | Professor Theo Retical<br>School: University of Virginia<br>Years of Experience: 6<br>Impact factor: 18 |

*Isolated Choice condition:*

**Note: This screenshot has been modified to protect the anonymity of the review process by replacing the names of scientists used in the study with aliases. The photos have been modified because we do not have permission to reprint the professional photos of people used as stimuli.**

You will recommend five people to join the speaking team as a representative from each of the five focus areas: Energy, Health, Financial Literacy, Education, and Civic Engagement. **Your recommendations will actually help determine whom we invite to the conference.**

Whom would you like to recommend to speak about **Financial Literacy** at the conference?

| <u>Financial Literacy Candidate 1</u>                                                                       | <u>Financial Literacy Candidate 2</u>                                                                                 | <u>Financial Literacy Candidate 3</u>                                                                     |
|-------------------------------------------------------------------------------------------------------------|-----------------------------------------------------------------------------------------------------------------------|-----------------------------------------------------------------------------------------------------------|
|                            |                                      |                         |
| Professor Val Adictorian<br>School: Northwestern University<br>Years of Experience: 17<br>Impact factor: 58 | Professor Marsha Mellow<br>School: University of California, Berkeley<br>Years of Experience: 17<br>Impact factor: 32 | Professor Cooke Edoh<br>School: Carnegie Mellon University<br>Years of Experience: 5<br>Impact factor: 13 |

Real photos used in survey

What is your gender identity?

Man

Woman

Another identity not listed

---

This space is provided if you have any additional comments or feedback for the research team.

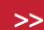

### Screenshots of Study S1 Stimuli.

In this study, you will imagine that you are working in the office of the President of a four-year university in the United States. The President is putting together a task force of 5 professors to review the school's general education requirements and suggest changes.

The issues under discussion will include grading policies, required classes for undergraduates, and the creation of new courses. Because these decisions require knowledge from across all academic areas of the university, the President wants to include one professor from each of the university's five academic divisions in the task force.

This task force is quite prestigious and public, as your university is an academic model for many American four-year universities. Serving on this task force is likely to gain professors recognition and it is a very impressive act of service to add to their resume, which will help them if they seek promotions or raises.

---

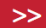

What is the focus of the task force created by the University President?

University Community and Culture

General Education

Advancement in Quantitative Science

Service and Civic Engagement

Who will be included in the task force?

1 faculty member

15 faculty members

5 faculty members from the same academic division of the university

5 faculty members, one from each academic division of the university

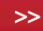

*Collective Choice condition:*

In this study, you will imagine that you are working in the office of the President of a four-year university in the United States. The President is putting together a task force of 5 professors to review the school's general education requirements and suggest changes.

The issues under discussion by the task force will include grading policies, required classes for undergraduates, and the creation of new courses. Because these decisions require knowledge from across all academic areas of the university, the President wants to include one professor from each of the university's five academic divisions in the task force.

This task force is quite prestigious and public, as your university is an academic model for many American four-year universities. Serving on this task force is likely to gain professors recognition and it is a very impressive act of service to add to their resume, which will help them if they seek promotions or raises.

The university President has created a shortlist of 15 professors across the university's five academic divisions. There must be 1 professor from each of these divisions on the task force. The President has asked you to select all 5 of the professors who will serve on the task force.

---

A red rectangular button with rounded corners, containing a white double arrow symbol (>>) pointing to the right.

*Isolated Choice condition:*

In this study, you will imagine that you are working in the office of the President of a four-year university in the United States. The President is putting together a task force of 5 professors to review the school's general education requirements and suggest changes.

The issues under discussion by the task force will include grading policies, required classes for undergraduates, and the creation of new courses. Because these decisions require knowledge from across all academic areas of the university, the President wants to include one professor from each of the university's five academic divisions in the task force.

This task force is quite prestigious and public, as your university is an academic model for many American four-year universities. Serving on this task force is likely to gain professors recognition and it is a very impressive act of service to add to their resume, which will help them if they seek promotions or raises.

The university President has created a shortlist of 15 professors across the university's five academic divisions. There must be 1 professor from each of these divisions on the task force. The President has asked you to select 1 of the professors who will serve on the task force.

---



How many of the five professors on the General Education Task Force will you be responsible for selecting from the University President's shortlist of fifteen professors?

Zero

One

Two

Three

Four

Five

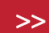

We will now ask you to read a little bit more about the task force and its mission to ensure you have all the information you need.

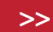

Here is the stated mission of the task force:

A committee of faculty members from across all the academic divisions of the university should undertake a review of the curriculum, with a particular focus on the General Education requirements. **This committee should address the following questions and recommend reforms consistent with its answers to them:**

- **What purposes should General Education requirements serve?**
- **How do our General Education requirements compare to those at peer institutions?**
- **What percentage of students' required coursework should be devoted to the fulfillment of the General Education requirements?**

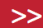

*Collective Choice condition:*

The university's 5 academic divisions are:

1. Arts and Humanities
2. Business
3. Engineering
4. Natural Sciences
5. Social Sciences

There are three professors from each division on the shortlist. **You must pick one professor from each division to serve on the task force.**

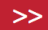*Isolated Choice condition:*

The university's 5 academic divisions are:

1. Arts and Humanities
2. Business
3. Engineering
4. Natural Sciences
5. Social Sciences

There are three professors from the Social Sciences division on the shortlist. **You must pick one professor from this division to serve on the task force.**

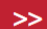

*Collective Choice condition (the screenshots below were shown on a single screen):*

Here is the shortlist of 15 professors. Please select your choices for the task force by dragging one (and only one) professor into each of the boxes. **Make sure to pick one professor from each academic division.**

If you change your mind on any of your selections, you can drag the professor you selected out of the box and replace them with a new professor.

Whom would you like to select for the university's task force on general education?

**Items**

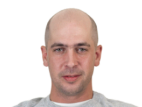

Academic division: Arts and Humanities  
Title: Full Professor (with tenure)  
Department: English  
Years at university: 12

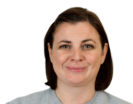

Academic division: Arts and Humanities  
Title: Associate Professor (with tenure)  
Department: European Studies  
Years at university: 7

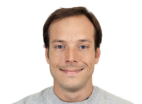

Academic division: Arts and Humanities  
Title: Assistant Professor (without tenure)  
Department: East Asian Studies  
Years at university: 4

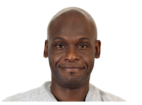

Academic division: Business  
Title: Full Professor (with tenure)  
Department: Management  
Years at university: 12

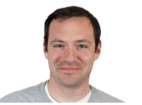

Academic division: Business  
Title: Associate Professor (with tenure)  
Department: Accounting  
Years at university: 7

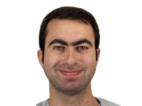

Academic division: Business  
Title: Assistant Professor (without tenure)  
Department: Marketing  
Years at university: 5

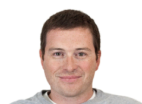

Academic division: Engineering  
Title: Full Professor (with tenure)  
Department: Mechanical Engineering  
Years at university: 11

**Your Selection from Arts and Humanities**

**Your Selection from Business**

**Your Selection from Engineering**

**Your Selection from Natural Sciences**

**Your Selection from Social Sciences**

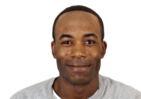

Academic division: Engineering  
Title: Associate Professor (with tenure)  
Department: Computer Engineering  
Years at university: 8

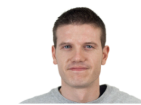

Academic division: Engineering  
Title: Assistant Professor (without tenure)  
Department: Electrical Engineering  
Years at university: 4

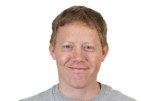

Academic division: Natural Sciences  
Title: Full Professor (with tenure)  
Department: Physics  
Years at university: 11

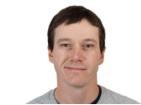

Academic division: Natural Sciences  
Title: Associate Professor (with tenure)  
Department: Chemistry  
Years at university: 8

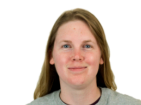

Academic division: Natural Sciences  
Title: Assistant Professor (without tenure)  
Department: Ecology  
Years at university: 5

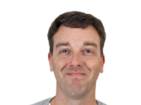

Academic division: Social Sciences  
Title: Full Professor (with tenure)  
Department: Political Science  
Years at university: 12

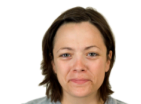

Academic division: Social Sciences  
Title: Associate Professor (with tenure)  
Department: Psychology  
Years at university: 7

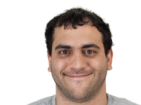

Academic division: Social Sciences  
Title: Assistant Professor (without tenure)  
Department: Sociology  
Years at university: 4

*Isolated Choice condition:*

Here is the shortlist of 3 professors from the Social Sciences division. Please select your choice for the task force by dragging one (and only one) professor into the box.

If you change your mind on your selection, you can drag the professor you selected out of the box and replace them with a new professor.

**Whom would you like to select for the university's task force on general education?**

**Items**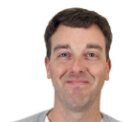

Academic division:  
Social Sciences  
Title: Full Professor  
(with tenure)  
Department: Political  
Science  
Years at university: 12

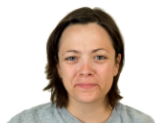

Academic division:  
Social Sciences  
Title: Associate  
Professor (with tenure)  
Department:  
Psychology  
Years at university: 7

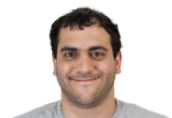

Academic division:  
Social Sciences  
Title: Assistant  
Professor (without  
tenure)  
Department: Sociology  
Years at university: 4

**Your Selection from Social Sciences**

What is your gender identity?

Man

Woman

Another identity not listed

---

This space is provided if you have any additional comments or feedback for the research team.

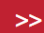

**Study S2 Stimuli.**

Note: The *collective choice* condition in this study is identical to Study 1, so we only provide screenshots for the *isolated choice* condition.

We are interested in how people make hiring decisions.

In this study, you will imagine that you are a hiring manager for a technology company. The company is looking to hire 5 people to fill 5 different roles: Product Manager, Software Engineer, User Experience Designer, Marketing Analyst, and Sales Representative.

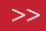

What are we interested in?

How people make decisions regarding which products to buy

How people make hiring decisions

How people evaluate consumer products

How people evaluate others who make certain decisions

---

How many roles is the company looking to fill?

Zero

One

Two

Three

Four

Five

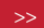

We are interested in how people make hiring decisions.

In this study, you will imagine that you are a hiring manager for a technology company. The company is looking to hire 5 people to fill 5 different roles: Product Manager, Software Engineer, User Experience Designer, Marketing Analyst, and Sales Representative.

You need to hire someone to fill 1 of these roles. It is your goal to hire the candidate whom you think will make the company the most successful.

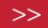

Here are the job descriptions for each of the job titles. You will be hiring a candidate for the Product Manager position:

**Product Manager:** A product manager communicates a product vision from management to the development and implementation teams. The product manager investigates, selects, and drives the development of products for the company.

**Software Engineer:** A software engineer writes computer code to design, develop, maintain, test, and evaluate computer software.

**Marketing Analyst:** A marketing analyst gathers, records, and analyzes data about issues relating to the marketing of products and services.

**User Experience Designer:** A user experience designer enhances user satisfaction with a product by improving the usability, accessibility, and pleasure provided in the interaction with the product.

**Sales Representative:** A sales representative is responsible for selling the product to consumers and ensuring that consumers have positive experiences with the product.

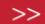

*Note that the screenshots below were shown on a single screen:*

There are three candidates for the position you need to fill (Product Manager). Please select your choice for this position by dragging one (and only one) candidate into the box.

If you change your mind on your selection, you can drag the person you selected out of the box and replace them with a new candidate.

You will also make four unrelated choices on this page. There are three candidates for each choice. If you change your mind on any of your selections, you can drag the item out of the box and replace with a new item.

Please make your selections from the candidates below:

**Items**

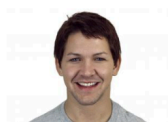

Most recent job: Senior Product Manager at Google  
Years of experience: 5

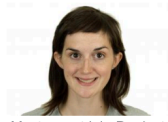

Most recent job: Product Manager at Yahoo  
Years of experience: 2

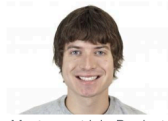

Most recent job: Product Manager Intern at Google  
Years of experience: 0

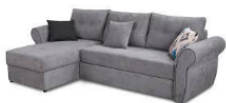

Softness level: Very firm

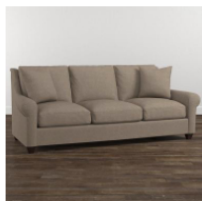

Softness level: Medium

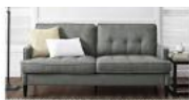

Softness level: Very soft

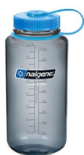

Price: \$8.29

**Your Selection for Product Manager**

**Your Selection for Best Couch**

**Your Selection for Best Water Bottle**

**Your Selection for Best Shampoo**

**Your Selection for Best Pen**

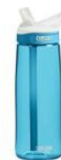

Price: \$11.49

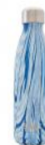

Price: \$34.99

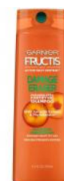

Price: \$4.49

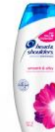

Price: \$6.99

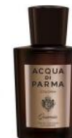

Price: \$30

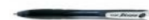

Type: Ballpoint pen  
Price: \$0.65

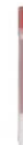

Type: Gel ink pen  
Price: \$1.50

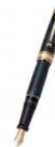

Type: Fountain pen  
Price: \$350

What is your gender identity?

Man

Woman

Another identity not listed

---

This space is provided if you have any additional comments or feedback for the research team.

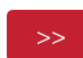

### Screenshots of Study S3 Stimuli

We are interested in how people make hiring decisions.

In this study, you will imagine that you are a hiring manager for a technology company. The company is looking to hire a new tech team. Hiring a new tech team involves hiring 5 people to fill 5 different roles on the team: Product Manager, Software Engineer, User Experience Designer, Marketing Analyst, and Sales Representative.



What are we interested in?

How people evaluate others who make certain decisions

How people make hiring decisions

How people evaluate consumer products

How people make decisions regarding which products to buy

How many roles is the company looking to fill?

Zero

One

Two

Three

Four

Five

Who is the company looking to hire?

A new CEO

A tech team

A writing team

You

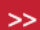

*Collective Choice condition, Low Diversity condition:*

We are interested in how people make hiring decisions.

In this study, you will imagine that you are a hiring manager for a technology company. The company is looking to hire a new tech team. Hiring a new tech team involves hiring 5 people to fill 5 different roles on the team: Product Manager, Software Engineer, User Experience Designer, Marketing Analyst, and Sales Representative.

Before you begin making hiring decisions, we would like to give you more information about the tech company you work for. Your company was founded in 2003 as a small startup, and it has grown to a thriving mid-size organization since then. Headquartered in New York, the organization also has offices in Chicago and Houston. 19% of the employees at your company are women, and 98% of the employees have college degrees.

You need to hire people to fill all 5 of these roles. It is your goal to hire the candidates whom you think will make the company and team the most successful.

>>

*Collective Choice condition, High Diversity condition:*

We are interested in how people make hiring decisions.

In this study, you will imagine that you are a hiring manager for a technology company. The company is looking to hire a new tech team. Hiring a new tech team involves hiring 5 people to fill 5 different roles on the team: Product Manager, Software Engineer, User Experience Designer, Marketing Analyst, and Sales Representative.

Before you begin making hiring decisions, we would like to give you more information about the tech company you work for. Your company was founded in 2003 as a small startup, and it has grown to a thriving mid-size organization since then. Headquartered in New York, the organization also has offices in Chicago and Houston. 48% of the employees at your company are women, and 98% of the employees have college degrees.

You need to hire people to fill all 5 of these roles. It is your goal to hire the candidates whom you think will make the company and team the most successful.

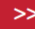

*Isolated Choice condition, Low Diversity condition:*

We are interested in how people make hiring decisions.

In this study, you will imagine that you are a hiring manager for a technology company. The company is looking to hire a new tech team. Hiring a new tech team involves hiring 5 people to fill 5 different roles on the team: Product Manager, Software Engineer, User Experience Designer, Marketing Analyst, and Sales Representative.

Before you begin making hiring decisions, we would like to give you more information about the tech company you work for. Your company was founded in 2003 as a small startup, and it has grown to a thriving mid-size organization since then. Headquartered in New York, the organization also has offices in Chicago and Houston. 19% of the employees at your company are women, and 98% of the employees have college degrees.

You need to hire someone to fill 1 of these roles. It is your goal to hire the candidate whom you think will make the company and team the most successful.

A red rectangular button with white double right-pointing arrows (>>).

*Isolated Choice condition, High Diversity condition:*

We are interested in how people make hiring decisions.

In this study, you will imagine that you are a hiring manager for a technology company. The company is looking to hire a new tech team. Hiring a new tech team involves hiring 5 people to fill 5 different roles on the team: Product Manager, Software Engineer, User Experience Designer, Marketing Analyst, and Sales Representative.

Before you begin making hiring decisions, we would like to give you more information about the tech company you work for. Your company was founded in 2003 as a small startup, and it has grown to a thriving mid-size organization since then. Headquartered in New York, the organization also has offices in Chicago and Houston. 48% of the employees at your company are women, and 98% of the employees have college degrees.

You need to hire someone to fill 1 of these roles. It is your goal to hire the candidate whom you think will make the company and team the most successful.

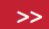

*Collective Choice condition:*

Here are the job descriptions for each of the job titles:

**Product Manager:** A product manager communicates a product vision from management to the development and implementation teams. The product manager investigates, selects, and drives the development of products for the company.

**Software Engineer:** A software engineer writes computer code to design, develop, maintain, test, and evaluate computer software.

**Marketing Analyst:** A marketing analyst gathers, records, and analyzes data about issues relating to the marketing of products and services.

**User Experience Designer:** A user experience designer enhances user satisfaction with a product by improving the usability, accessibility, and pleasure provided in the interaction with the product.

**Sales Representative:** A sales representative is responsible for selling the product to consumers and ensuring that consumers have positive experiences with the product.



*Isolated Choice condition:*

Here are the job descriptions for each of the job titles. You will be hiring a candidate for the User Experience Designer position:

**User Experience Designer:** A user experience designer enhances user satisfaction with a product by improving the usability, accessibility, and pleasure provided in the interaction with the product.

**Product Manager:** A product manager communicates a product vision from management to the development and implementation teams. The product manager investigates, selects, and drives the development of products for the company.

**Software Engineer:** A software engineer writes computer code to design, develop, maintain, test, and evaluate computer software.

**Marketing Analyst:** A marketing analyst gathers, records, and analyzes data about issues relating to the marketing of products and services.

**Sales Representative:** A sales representative is responsible for selling the product to consumers and ensuring that consumers have positive experiences with the product.



*Collective Choice condition, Low Diversity condition (the screenshots below were shown on a single screen):*

There are three candidates for each position on the tech team. Please select your choice for each of these positions by dragging one (and only one) candidate into each of the boxes. Please ONLY drag candidates who are qualified for each position into a given box.

Here are some quick facts about your company: Your company was founded in 2003 as a small startup, and it has grown to a thriving mid-size organization since then. Headquartered in New York, the organization also has offices in Chicago and Houston. 19% of the employees at your company are women, and 98% of the employees have college degrees.

If you change your mind on any of your selections, you can drag the you selected out of the box and replace them with a new candidate.

Whom would you like to hire for each of the positions?

|                                                                                                                                                                                                                                                                                                                                                                                                                                                                                                                                                                                                                                                                  |                                                                                                                                                                                                                                               |
|------------------------------------------------------------------------------------------------------------------------------------------------------------------------------------------------------------------------------------------------------------------------------------------------------------------------------------------------------------------------------------------------------------------------------------------------------------------------------------------------------------------------------------------------------------------------------------------------------------------------------------------------------------------|-----------------------------------------------------------------------------------------------------------------------------------------------------------------------------------------------------------------------------------------------|
| <p><b>Items</b></p> <p><b>Product Manager Candidate 1:</b></p>  <p>Most recent job: Senior Product Manager at Google<br/>Years of experience: 5</p> <p><b>Product Manager Candidate 2:</b></p>  <p>Most recent job: Product Manager at Yahoo<br/>Years of experience: 2</p> <p><b>Product Manager Candidate 3:</b></p>  <p>Most recent job: Product Manager Intern at Google<br/>Years of experience: 0</p> | <p><b>Your Selection for Product Manager</b></p><br><br><p><b>Your Selection for Software Engineer</b></p><br><br><p><b>Your Selection for Marketing Analyst</b></p><br><br><p><b>Your Selection for User Experience Designer</b></p><br><br> |
|------------------------------------------------------------------------------------------------------------------------------------------------------------------------------------------------------------------------------------------------------------------------------------------------------------------------------------------------------------------------------------------------------------------------------------------------------------------------------------------------------------------------------------------------------------------------------------------------------------------------------------------------------------------|-----------------------------------------------------------------------------------------------------------------------------------------------------------------------------------------------------------------------------------------------|

**Software Engineer Candidate 1:**



Most recent job: Senior Software Engineer at Square  
Years of experience: 4

**Software Engineer Candidate 2:**



Most recent job: Software Engineer at Palantir  
Years of experience: 3

**Software Engineer Candidate 3:**



Most recent job: Software Engineer at Zynga  
Years of experience: 2

**Marketing Analyst Candidate 1:**



Most recent job: Marketing Analyst at Nestle  
Years of experience: 3

**Marketing Analyst Candidate 2:**



Most recent job: Marketing Analyst at Microsoft  
Years of experience: 1

**Marketing Analyst Candidate 3:**



Most recent job: Marketing Analyst Intern at L'Oreal  
Years of experience: 0

**User Experience Designer Candidate 1:**



Most recent job: User Experience Designer at Intel  
Years of experience: 5

**User Experience Designer Candidate 2:**



Most recent job: User Experience Designer at BuzzFeed  
Years of experience: 3

**Your Selection for Sales Representative**

  
  

**User Experience Designer Candidate 3:**



Most recent job: User Experience Designer at Facebook  
Years of experience: 1

**Sales Representative Candidate 1:**



Most recent job: Sales Representative at Bloomberg  
Years of experience: 5

**Sales Representative Candidate 2:**



Most recent job: Sales Representative at Salesforce  
Years of experience: 2

**Sales Representative Candidate 3:**



Most recent job: Sales Representative at Apple  
Years of experience: 2

*Collective Choice condition, High Diversity condition (the screenshots below were shown on a single screen):*

There are three candidates for each position on the tech team. Please select your choice for each of these positions by dragging one (and only one) candidate into each of the boxes. Please ONLY drag candidates who are qualified for each position into a given box.

Here are some quick facts about your company: Your company was founded in 2003 as a small startup, and it has grown to a thriving mid-size organization since then. Headquartered in New York, the organization also has offices in Chicago and Houston. 48% of the employees at your company are women, and 98% of the employees have college degrees.

If you change your mind on any of your selections, you can drag the you selected out of the box and replace them with a new candidate.

Whom would you like to hire for each of the positions?

**Items**

**Product Manager Candidate 1:**  
  
 Most recent job: Senior Product Manager at Google  
 Years of experience: 5

**Product Manager Candidate 2:**  
  
 Most recent job: Product Manager at Yahoo  
 Years of experience: 2

**Product Manager Candidate 3:**  
  
 Most recent job: Product Manager Intern at Google  
 Years of experience: 0

**Your Selection for Product Manager**

**Your Selection for Software Engineer**

**Your Selection for Marketing Analyst**

**Your Selection for User Experience Designer**

**Marketing Analyst Candidate 2:**  
  
 Most recent job: Marketing Analyst at Microsoft  
 Years of experience: 1

**Marketing Analyst Candidate 3:**  
  
 Most recent job: Marketing Analyst Intern at L'Oreal  
 Years of experience: 0

**User Experience Designer Candidate 1:**  
  
 Most recent job: User Experience Designer at Intel  
 Years of experience: 5

**User Experience Designer Candidate 2:**  
  
 Most recent job: User Experience Designer at BuzzFeed  
 Years of experience: 3

**Software Engineer Candidate 1:**  
  
 Most recent job: Senior Software Engineer at Square  
 Years of experience: 4

**Software Engineer Candidate 2:**  
  
 Most recent job: Software Engineer at Palantir  
 Years of experience: 3

**Software Engineer Candidate 3:**  
  
 Most recent job: Software Engineer at Zynga  
 Years of experience: 2

**Marketing Analyst Candidate 1:**  
  
 Most recent job: Marketing Analyst at Nestle  
 Years of experience: 3

**Your Selection for Sales Representative**

**User Experience Designer Candidate 3:**  
  
 Most recent job: User Experience Designer at Facebook  
 Years of experience: 1

**Sales Representative Candidate 1:**  
  
 Most recent job: Sales Representative at Bloomberg  
 Years of experience: 5

**Sales Representative Candidate 2:**  
  
 Most recent job: Sales Representative at Salesforce  
 Years of experience: 2

**Sales Representative Candidate 3:**  
  
 Most recent job: Sales Representative at Apple  
 Years of experience: 2

*Isolated Choice condition, Low Diversity condition:*

There are three candidates for the position you need to fill (Product Manager) on the tech team. Please select your choice for this position by dragging one (and only one) candidate into the box.

Here are some quick facts about your company: Your company was founded in 2003 as a small startup, and it has grown to a thriving mid-size organization since then. Headquartered in New York, the organization also has offices in Chicago and Houston. 19% of the employees at your company are women, and 98% of the employees have college degrees.

If you change your mind on your selection, you can drag the person you selected out of the box and replace them with a new candidate.

Whom would you like to hire for the Product Manager job?

**Items**

**Product Manager  
Candidate 1:**

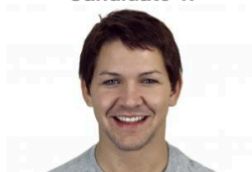

Most recent job: Senior  
Product Manager at  
Google  
Years of experience: 5

**Product Manager  
Candidate 2:**

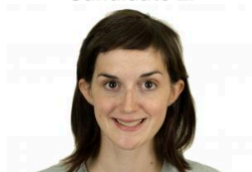

Most recent job: Product  
Manager at Yahoo  
Years of experience: 2

**Product Manager  
Candidate 3:**

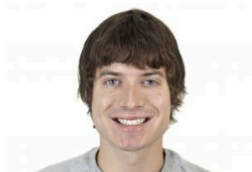

Most recent job: Product  
Manager Intern at Google  
Years of experience: 0

**Your Selection for Product Manager**



*Isolated Choice condition, High Diversity condition:*

There are three candidates for the position you need to fill (Product Manager) on the tech team. Please select your choice for this position by dragging one (and only one) candidate into the box.

Here are some quick facts about your company: Your company was founded in 2003 as a small startup, and it has grown to a thriving mid-size organization since then. Headquartered in New York, the organization also has offices in Chicago and Houston. 48% of the employees at your company are women, and 98% of the employees have college degrees.

If you change your mind on your selection, you can drag the person you selected out of the box and replace them with a new candidate.

Whom would you like to hire for the Product Manager job?

**Items**

**Product Manager  
Candidate 1:**

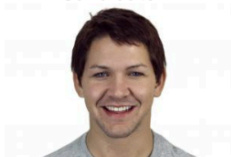

Most recent job: Senior  
Product Manager at  
Google  
Years of experience: 5

**Product Manager  
Candidate 2:**

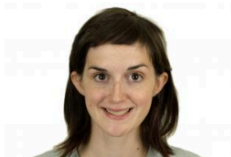

Most recent job: Product  
Manager at Yahoo  
Years of experience: 2

**Product Manager  
Candidate 3:**

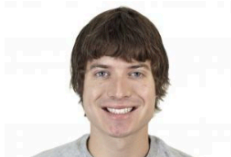

Most recent job: Product  
Manager Intern at Google  
Years of experience: 0

**Your Selection for Product Manager**

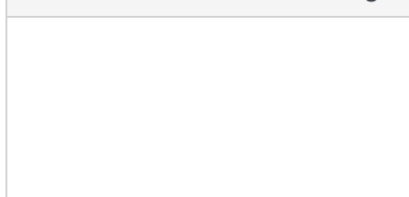

What is your gender identity?

Man

Woman

Another identity not listed

---

This space is provided if you have any additional comments or feedback for the research team.

>>

## Screenshots of Study S4 Stimuli.

We are interested in how people make hiring decisions.

In this study, you will imagine that you are a hiring manager for a technology company. The company is looking to hire 5 people to fill 5 different roles: Product Manager, Software Engineer, User Experience Designer, Marketing Analyst, and Sales Representative.

>>

What are we interested in?

How people make hiring decisions

How people make decisions regarding which products to buy

How people evaluate consumer products

How people evaluate others who make certain decisions

---

How many roles is the company looking to fill?

Zero

One

Two

Three

Four

Five

>>

*Collective Choice condition:*

We are interested in how people make hiring decisions.

In this study, you will imagine that you are a hiring manager for a technology company. The company is looking to hire 5 people to fill 5 different roles: Product Manager, Software Engineer, User Experience Designer, Marketing Analyst, and Sales Representative.

You need to hire people to fill all 5 of these roles. It is your goal to hire the candidates whom you think will make the company the most successful.

A red rectangular button with white double right-pointing arrows (>>) inside, indicating a next step or continuation.

*Isolated Choice condition:*

We are interested in how people make hiring decisions.

In this study, you will imagine that you are a hiring manager for a technology company. The company is looking to hire 5 people to fill 5 different roles: Product Manager, Software Engineer, User Experience Designer, Marketing Analyst, and Sales Representative.

You need to hire someone to fill 1 of these roles. It is your goal to hire the candidate whom you think will make the company the most successful.

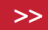

*Collective Choice condition:*

Here are the job descriptions for each of the job titles:

**Product Manager:** A product manager communicates a product vision from management to the development and implementation teams. The product manager investigates, selects, and drives the development of products for the company.

**Software Engineer:** A software engineer writes computer code to design, develop, maintain, test, and evaluate computer software.

**Marketing Analyst:** A marketing analyst gathers, records, and analyzes data about issues relating to the marketing of products and services.

**User Experience Designer:** A user experience designer enhances user satisfaction with a product by improving the usability, accessibility, and pleasure provided in the interaction with the product.

**Sales Representative:** A sales representative is responsible for selling the product to consumers and ensuring that consumers have positive experiences with the product.

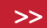

*Isolated Choice condition:*

Here are the job descriptions for each of the job titles. You will be hiring a candidate for the Sales Representative position:

**Sales Representative:** A sales representative is responsible for selling the product to consumers and ensuring that consumers have positive experiences with the product.

**Product Manager:** A product manager communicates a product vision from management to the development and implementation teams. The product manager investigates, selects, and drives the development of products for the company.

**Software Engineer:** A software engineer writes computer code to design, develop, maintain, test, and evaluate computer software.

**Marketing Analyst:** A marketing analyst gathers, records, and analyzes data about issues relating to the marketing of products and services.

**User Experience Designer:** A user experience designer enhances user satisfaction with a product by improving the usability, accessibility, and pleasure provided in the interaction with the product.

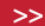

*Collective Choice condition (the screenshots below were shown on a single screen):*

There are three candidates for each position. Please select your choice for each of these positions by dragging one (and only one) candidate into each of the boxes.

If you change your mind on any of your selections, you can drag the you selected out of the box and replace them with a new candidate.

Whom would you like to hire for each of the positions?

- Items**
- 

Most recent job: Senior Product Manager at Google  
Years of experience: 5
  - 

Most recent job: Product Manager at Yahoo  
Years of experience: 2
  - 

Most recent job: Product Manager Intern at Google  
Years of experience: 0
  - 

Most recent job: Senior Software Engineer at Square  
Years of experience: 4
  - 

Most recent job: Software Engineer at Palantir  
Years of experience: 3
  - 

Most recent job: Software Engineer at Zynga  
Years of experience: 2
  - 

Most recent job: Marketing Analyst at Nestle  
Years of experience: 3
  - 

Most recent job: Marketing Analyst at Microsoft  
Years of experience: 1
  - 

Most recent job: Marketing Analyst Intern at L'Oreal  
Years of experience: 0

**Your Selection for Product Manager**

**Your Selection for Software Engineer**

**Your Selection for Marketing Analyst**

**Your Selection for User Experience Designer**

**Your Selection for Sales Representative**

- 

Most recent job: User Experience Designer at Intel  
Years of experience: 5
- 

Most recent job: User Experience Designer at BuzzFeed  
Years of experience: 3
- 

Most recent job: User Experience Designer at Facebook  
Years of experience: 1
- 

Most recent job: Sales Representative at Bloomberg  
Years of experience: 5
- 

Most recent job: Sales Representative at Salesforce  
Years of experience: 2
- 

Most recent job: Sales Representative at Apple  
Years of experience: 2

*Isolated Choice condition*

There are three candidates for the position you need to fill (Sales Representative). Please select your choice for this position by dragging one (and only one) candidate into the box.

If you change your mind on your selection, you can drag the person you selected out of the box and replace them with a new candidate.

Whom would you like to hire for the Sales Representative job?

**Items**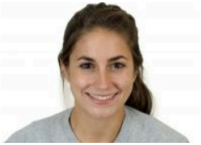

Most recent job: Sales Representative at Bloomberg  
Years of experience: 5

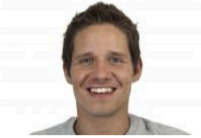

Most recent job: Sales Representative at Salesforce  
Years of experience: 2

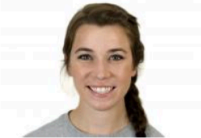

Most recent job: Sales Representative at Apple  
Years of experience: 2

**Your Selection for Sales Representative**

| Your Selection for Sales Representative |
|-----------------------------------------|
|                                         |

What is your gender identity?

Man

Woman

Another identity not listed

---

This space is provided if you have any additional comments or feedback for the research team.



Supplement: mnsc.2019.3533.sm1.pdf [file mnsc.2019.3533.sm1.pdf]
